# Supplementary material for: Association of environmental markers with childhood type 1 diabetes mellitus revealed by a long questionnaire on early life exposures and lifestyle in a case–control study
Source: Springer Nature journal article supplement (doi:10.1186/s12889-016-3690-9), 2016-09-28

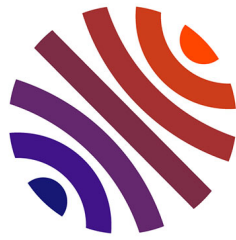

**HAL**  
open science

## Association of environmental markers with childhood type 1 diabetes mellitus revealed by a long questionnaire on early life exposures and lifestyle in a case–control study

Félix Balazard, Sophie Le Fur, Sophie Valtat, Alain-Jacques Valleron, Pierre Bougnères

### ► To cite this version:

Félix Balazard, Sophie Le Fur, Sophie Valtat, Alain-Jacques Valleron, Pierre Bougnères. Association of environmental markers with childhood type 1 diabetes mellitus revealed by a long questionnaire on early life exposures and lifestyle in a case–control study. *BMC Public Health*, 2016, 16 (1), pp.1021. 10.1186/s12889-016-3690-9 . inserm-01373656

**HAL Id: inserm-01373656**

**<https://inserm.hal.science/inserm-01373656>**

Submitted on 29 Sep 2016

**HAL** is a multi-disciplinary open access archive for the deposit and dissemination of scientific research documents, whether they are published or not. The documents may come from teaching and research institutions in France or abroad, or from public or private research centers.

L'archive ouverte pluridisciplinaire **HAL**, est destinée au dépôt et à la diffusion de documents scientifiques de niveau recherche, publiés ou non, émanant des établissements d'enseignement et de recherche français ou étrangers, des laboratoires publics ou privés.

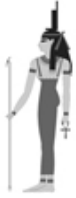

## ISIS-DIAB

Cohorte Française sur les facteurs de risque  
génétiques et environnementaux du diabète  
auto-immun et de ses complications  
Assistance Publique-Hôpitaux de Paris

# ÉTUDE SUR L'ENVIRONNEMENT AVANT LA SURVENUE DU DIABÈTE CHEZ L'ENFANT *Questionnaire destiné aux patients et à leur famille*

Bonjour,

Vous avez accepté de répondre à ce questionnaire concernant votre environnement, nous vous en remercions. Vos réponses seront une aide précieuse dans la recherche des facteurs environnementaux impliqués dans la survenue du diabète. Cette enquête n'a pas pour but de trouver directement la cause du diabète mais de mettre les chercheurs sur des pistes de recherche.

Ce questionnaire concerne la santé et l'environnement de l'enfant diabétique avant sa naissance et dans les années qui ont précédé le diagnostic du diabète ; quelques questions concernent la grand-mère maternelle du patient, d'autres sa mère, et son père.

Les renseignements qui seront collectés resteront strictement confidentiels et ne seront pas rendus publics. Leur exploitation sera réservée aux médecins et aux équipes qui mènent cette recherche, tous soumis au secret médical. Les données informatisées seront stockées de façon anonyme.

## COMMENT RÉPONDRE AU QUESTIONNAIRE ?

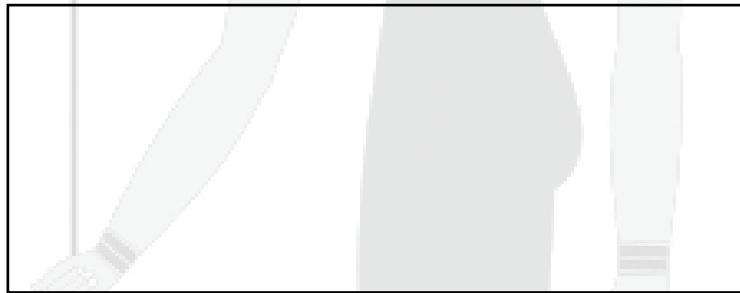

Remplir ce questionnaire devrait prendre entre 1 heure 30 et 2 heures. L'enfant diabétique sera toujours désigné comme «le patient».

Le questionnaire est organisé en plusieurs sections : afin d'en faciliter l'analyse, nous avons rassemblé des questions ouvertes (professions, dates, adresses...) dans une première partie, les suivantes ne comprennent que des questions avec des cases à cocher.

Plusieurs questions concernent la mère du patient, vous aurez donc à faire appel à votre mère pour y répondre ; pour d'autres, vous aurez besoin des carnets de santé.

Nous vous remercions d'utiliser **un stylo-bille noir ou bleu** (pas de stylo plume, de feutre, de crayon noir...) pour remplir ce questionnaire.

• Remplissez les espaces destinés au recueil des informations. Exemples :

Date de naissance du patient : |\_1\_|\_|4\_|\_|0\_|\_|3\_|\_|1\_|\_|9\_|\_|9\_|\_|9\_|

Profession du père du patient : .agriculteur

• Cochez la case correspondant à votre choix. Par défaut, ne cochez qu'une case. Exemple :  
Le patient a-t-il été au zoo ?

<sub>1</sub> Une fois

<sub>2</sub> Plusieurs fois

<sub>3</sub> Jamais

• Attention, dans certains cas, vous serez amené à passer des questions qui ne vous concernent pas ; suivez les indications qui vous seront données.

1. Nom et prénom du patient : .....

## 1 - QUESTIONS OUVERTES CONCERNANT LE PATIENT ET SA FAMILLE

### 1.1 - Les grands-parents

2. La **grand-mère maternelle** est-elle la mère biologique de la mère du patient?

1 Oui       2 Non ➡ Allez à la question 3

2.1. Si oui, quelle est la date de naissance de la grand-mère ?

|\_|\_|\_| |\_|\_|\_| |\_|\_|\_| |\_|\_|\_|

2.2. Quel est son pays d'origine .....

2.3. Quelle était l'adresse de cette grand-mère lorsqu'elle était enceinte de la mère du patient ?

Bâtiment .....

Numéro ..... Voie .....

Code postal ..... Ville .....

Pays .....

2.4. Quel était le métier de la grand-mère maternelle ? .....

2.5. La grand-mère a-t-elle été malade lorsqu'elle était enceinte de la mère du patient ?

2.5.1.  1 Oui Si oui, quelle était cette maladie ? .....

2 Non

3. Quel est le pays d'origine du **grand-père maternel** ? .....

4. Quel était son métier ? .....

5. Quel est le pays d'origine de la **grand-mère paternelle** ? .....

6. Quel était son métier ? .....

7. Quel est le pays d'origine du **grand-père paternel** ? .....

8. Quel était son métier ? .....

9. Un des grands-parents a-t-il eu une ou plusieurs maladies sérieuses (c'est-à-dire avec un diagnostic) pendant la petite enfance du patient ?

| 9.1. <input type="checkbox"/> 1 Oui | Si oui : | Qui ? | Quelle maladie ? |
|-------------------------------------|----------|-------|------------------|
|                                     |          | ..... | .....            |
|                                     |          | ..... | .....            |
|                                     |          | ..... | .....            |

2 Non

## 1.2 - La mère du patient

10. La mère est-elle la mère biologique du patient ?

<sub>1</sub> Oui

<sub>2</sub> Non ➡ Allez directement à la question 11 page 7

### La mère du patient avant sa naissance

10.1. Quelle est la date de naissance de la mère du patient ?

|\_|\_|\_| |\_|\_|\_| |\_|\_|\_|\_|\_|

10.2. Quel était le poids de naissance de la mère du patient ? |\_|\_|\_|\_|\_| g

10.3. A quel âge la mère a-t-elle eu ses premières règles ? |\_|\_| ans et |\_|\_| mois

10.4. Quel était son poids approximatif à 20 ans ? |\_|\_|\_|\_| kg

10.5. Quelle est sa taille adulte ? |\_| , |\_|\_|\_| m

### Les adresses de la mère du patient

10.6. Quelle était l'adresse ou les principales adresses de la mère pendant son enfance et son adolescence en commençant par celle où elle a passé le plus de temps ?

Bâtiment.....

Numéro ..... Voie .....

Code postal ..... Ville .....

Pays .....

-----

Bâtiment.....

Numéro ..... Voie .....

Code postal ..... Ville .....

Pays .....

-----

Bâtiment.....

Numéro ..... Voie .....

Code postal ..... Ville .....

Pays .....

10.7. Quelle était l'adresse de la mère juste avant la grossesse qui a donné naissance au futur diabétique ?

Bâtiment.....

Numéro ..... Voie .....

Code postal ..... Ville .....

Pays .....

10.8. **Pendant cette grossesse**, l'adresse de la mère était-elle la même que précédemment ?

1 Oui       2 Non

10.8.1. Si non, quelle était l'adresse de la mère **pendant cette grossesse** ?

Bâtiment.....  
Numéro ..... Voie .....  
Code postal ..... Ville .....  
Pays .....

10.9. **Entre la naissance du patient et le diagnostic du diabète**, l'adresse de la mère était-elle la même que précédemment ?

1 Oui       2 Non

10.9.1. Si non, quelle était l'adresse de la mère entre la naissance du patient et le diagnostic du diabète ?

Bâtiment.....  
Numéro ..... Voie .....  
Code postal ..... Ville .....  
Pays .....

### Les professions de la mère du patient

10.10. Quelles ont été les professions exercées par la mère du patient avant cette grossesse? .....

.....  
.....

10.11. Quelle était la profession de la mère **juste avant** cette grossesse ? .....

.....

10.12. La mère travaillait-elle pendant cette grossesse ?

10.12.1.  1 Oui    Si oui, cette profession était-elle différente ?

10.12.1.1.  1 Oui    Si oui, quelle était la profession de la mère ?

.....  
 2 Non

2 Non    ➔ Allez à la question 10.13 page 5

10.12.2. Quelle était l'adresse de son lieu de travail ?

Bâtiment.....  
Numéro ..... Voie .....  
Code postal ..... Ville .....  
Pays .....

10.12.3. Se rendait-elle à son travail pendant cette grossesse en utilisant les transports en commun ?

1 Oui       2 Non



Attention, la grossesse dont il s'agit est celle qui s'est achevée par la naissance du patient diabétique

10.21. La mère du patient avait-elle une maladie chronique avant cette grossesse ?

- 10.21.1. [ ] 1 Oui Si oui, laquelle ?
[ ] 2 Non

10.22. Prenait-elle des médicaments avant cette grossesse ?

- 10.22.1. [ ] 1 Oui Si oui, lesquels ?
[ ] 2 Non

La mère a-t-elle eu pendant sa grossesse :

Oui Non Ne sait pas

10.23. La rougeole? [ ] 1 [ ] 2 [ ] 3

10.23.1. Si oui, à quelle date (si vous n'avez pas l'information exacte, merci d'indiquer le mois) ?

Date : | | | | | | | | | |

10.24. Un contact avec un rougeoleux ? [ ] 1 [ ] 2 [ ] 3

10.24.1. Si oui, à quelle date (si vous n'avez pas l'information exacte, merci d'indiquer le mois) ?

Date : | | | | | | | | | |

10.25. Les oreillons ? [ ] 1 [ ] 2 [ ] 3

10.25.1. Si oui, à quelle date (si vous n'avez pas l'information exacte, merci d'indiquer le mois) ?

Date : | | | | | | | | | |

10.26. La varicelle ? [ ] 1 [ ] 2 [ ] 3

10.26.1. Si oui, à quelle date (si vous n'avez pas l'information exacte, merci d'indiquer le mois) ?

Date : | | | | | | | | | |

10.27. La grippe ? [ ] 1 [ ] 2 [ ] 3

10.27.1. Si oui, à quelle date (si vous n'avez pas l'information exacte, merci d'indiquer le mois) ?

Date : | | | | | | | | | |

10.28. Quelle est l'adresse du lieu de naissance du futur diabétique (maternité, hôpital...) ?

Bâtiment.....

Numéro .....Voie .....

Code postal.....Ville .....

Pays .....

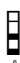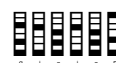

10.29. **La mère a-t-elle subi une intervention chirurgicale pendant l'enfance du futur diabétique ?**

10.29.1.  1 Oui **Si oui, combien ?**

10.29.2. **Laquelle ou lesquelles ?** .....

.....  
 .....

2 Non

### 1.3 - Le père du patient

11. **Quelle est la date de naissance du père du patient ?** ||||||||

12. **Quelle était la profession exercée par le père avant cette grossesse ?** .....

.....

13. **La profession du père pendant la grossesse était-elle différente ?**

13.1.  1 Oui **Si oui, quelle profession exerçait le père durant cette période ?** .....

.....

2 Non

14. **La profession du père entre la naissance du patient et le diagnostic du diabète était-elle différente ?**

14.1.  1 Oui **Si oui, quelle profession exerçait le père durant cette période ?** .....

.....

2 Non

15. **Le père a-t-il subi une intervention chirurgicale pendant l'enfance du futur diabétique ?**

15.1.  1 Oui **Si oui, combien ?**

15.2. **Laquelle ou lesquelles ?** .....

.....

2 Non

16. **Le père du patient avait-il une maladie chronique ?**

16.1.  1 Oui **Si oui, laquelle ?** .....

.....

2 Non

**Le père a-t-il été vacciné contre une des maladies suivantes :**

Oui

Non

17. **La rougeole ?** .....

1

2

18. **Les oreillons ?** .....

1

2

### 1.4 - Le patient entre sa naissance et la découverte du diabète

*Pour les questions qui suivent, aidez-vous du carnet de santé !*

19. **Quelle est la date de naissance du patient ?** ||||||||

20. **Si vous vous le rappelez, quel est le terme précis de l'accouchement ?** | semaines

21. **Quel était son poids à la naissance ?** ||| g



22. **Quelle était sa taille à la naissance ?** |\_\_|\_\_| cm

**Quel était son poids à :**

23. **Environ 1 mois (carnet de santé) ?** |\_\_|\_\_|\_\_|\_\_| g

24. **Environ 3 mois (carnet de santé) ?** |\_\_|,|\_\_|\_\_| kg

25. **Environ 6 mois (carnet de santé) ?** |\_\_|,|\_\_|\_\_| kg

26. **Environ 1 an (carnet de santé) ?** |\_\_|\_\_|,|\_\_|\_\_| kg

27. **Environ 18 mois (carnet de santé) ?** |\_\_|\_\_|,|\_\_|\_\_| kg

28. **Environ 2 ans (carnet de santé) ?** |\_\_|\_\_|,|\_\_|\_\_| kg

29. **A quel âge a-t-il marché ?** |\_\_|\_\_| mois

### La santé du patient

30. **Le patient a-t-il eu une maladie particulière diagnostiquée pendant sa première année?**

- 30.1. <sub>1</sub> Oui **Si oui, laquelle ?**.....  
<sub>2</sub> Non

**Avant le diagnostic du diabète, le patient a-t-il eu :**

Oui Non Ne sait pas

31. **La rougeole?** ..... <sub>1</sub> <sub>2</sub> <sub>3</sub>

31.1. **Si oui, à quelle date** (si vous n'avez pas l'information exacte, merci d'indiquer l'année) ?

Date : |\_\_|\_\_| |\_\_|\_\_| |\_\_|\_\_|\_\_|\_\_|

32. **Un contact avec un rougeoleux ?** ..... <sub>1</sub> <sub>2</sub> <sub>3</sub>

32.1. **Si oui, à quelle date** (si vous n'avez pas l'information exacte, merci d'indiquer l'année) ?

Date : |\_\_|\_\_| |\_\_|\_\_| |\_\_|\_\_|\_\_|\_\_|

33. **Les oreillons ?** ..... <sub>1</sub> <sub>2</sub> <sub>3</sub>

33.1. **Si oui, à quelle date** (si vous n'avez pas l'information exacte, merci d'indiquer l'année) ?

Date : |\_\_|\_\_| |\_\_|\_\_| |\_\_|\_\_|\_\_|\_\_|

34. **La varicelle ?** ..... <sub>1</sub> <sub>2</sub> <sub>3</sub>

34.1. **Si oui, à quelle date** (si vous n'avez pas l'information exacte, merci d'indiquer l'année) ?

Date : |\_\_|\_\_| |\_\_|\_\_| |\_\_|\_\_|\_\_|\_\_|

34.2. **a-t-il pris des antibiotiques ?** ..... <sub>1</sub> <sub>2</sub> <sub>3</sub>

35. **La grippe ?** ..... <sub>1</sub> <sub>2</sub> <sub>3</sub>

35.1. **Si oui, à quelle date** (si vous n'avez pas l'information exacte, merci d'indiquer l'année) ?

Date : |\_\_|\_\_| |\_\_|\_\_| |\_\_|\_\_|\_\_|\_\_|

36. **Le patient a-t-il été vacciné contre la rougeole ?** ..... <sub>1</sub> <sub>2</sub> <sub>3</sub>

36.1. **Si oui, à quelle date** (si vous n'avez pas l'information exacte, merci d'indiquer l'année) ?

Date : |\_\_|\_\_| |\_\_|\_\_| |\_\_|\_\_|\_\_|\_\_|

37. **Le patient a-t-il eu son rappel de vaccination contre la rougeole ?** ..... <sub>1</sub> <sub>2</sub> <sub>3</sub>

37.1. **Si oui, à quelle date** (si vous n'avez pas l'information exacte, merci d'indiquer l'année) ?

Date : |\_\_|\_\_| |\_\_|\_\_| |\_\_|\_\_|\_\_|\_\_|

38. **Entre la naissance et la découverte de son diabète, le patient avait-il subi une intervention chirurgicale ?**

1 Oui       2 Non ➡ Allez directement à la question 39

38.1. **Si oui, la ou lesquelles ?**

| Cause | Age         | Anesthésie générale            |                                |
|-------|-------------|--------------------------------|--------------------------------|
| ..... | _ _ _ 1 ans | <input type="checkbox"/> 2 Oui | <input type="checkbox"/> 3 Non |
| ..... | _ _ _ 4 ans | <input type="checkbox"/> 5 Oui | <input type="checkbox"/> 6 Non |
| ..... | _ _ _ 7 ans | <input type="checkbox"/> 8 Oui | <input type="checkbox"/> 9 Non |

*Si vous souhaitez ajouter des informations, merci d'utiliser une feuille vierge à la fin de ce questionnaire en indiquant bien le numéro de la question : 38.1*

39. **Entre la naissance et la découverte de son diabète, le patient avait-il été hospitalisé?**

1 Oui       2 Non ➡ Allez directement à la question 40

39.1. **Si oui, pour quelle raison ? .....  
dans quel hôpital ou clinique ?**

Hôpital ou clinique.....

Numéro ..... Voie .....

Code postal ..... Ville .....

Pays .....

**pour quelle raison ? .....  
dans quel hôpital ou clinique ?**

Hôpital ou clinique.....

Numéro ..... Voie .....

Code postal ..... Ville .....

Pays .....

*Si vous souhaitez ajouter des informations, merci d'utiliser une feuille vierge à la fin de ce questionnaire en indiquant bien le numéro de la question : 39.1*

40. **A quelle date le diabète a-t-il été diagnostiqué ?**

|\_|\_|\_| |\_|\_|\_| |\_|\_|\_|

### Les adresses du patient

41. **Combien de fois le patient a-t-il déménagé entre sa naissance et le diagnostic du diabète?**

|\_|\_| fois

42. **A quelle adresse vivait le patient entre sa naissance et la découverte du diabète, en cas de déménagements mentionnez en premier l'adresse où il a passé le plus de temps ?**

Bâtiment.....

Numéro ..... Voie .....

Code postal ..... Ville .....

Pays .....

-----

Bâtiment.....  
 Numéro ..... Voie .....  
 Code postal..... Ville .....  
 Pays .....

## 1.5 - La vie de la famille

### Les autres enfants

43. **Combien de frères et de sœurs vivaient au domicile familial entre la naissance et le diagnostic du diabète (ne pas compter le patient) ?** |\_\_|\_| enfants

44. **Des frères ou des sœurs sont-ils nés entre la naissance du patient et le diagnostic de son diabète ?**

44.1.  <sub>1</sub> Oui **Si oui, quelle est leur date de naissance et leur sexe ?**

Date : |\_\_|\_| |\_\_|\_| |\_\_|\_| |\_\_|\_| |\_\_|\_| <sub>1</sub> Sexe : |\_\_|\_| <sub>2</sub> F ou M

Date : |\_\_|\_| |\_\_|\_| |\_\_|\_| |\_\_|\_| |\_\_|\_| <sub>3</sub> Sexe : |\_\_|\_| <sub>4</sub> F ou M

Date : |\_\_|\_| |\_\_|\_| |\_\_|\_| |\_\_|\_| |\_\_|\_| <sub>5</sub> Sexe : |\_\_|\_| <sub>6</sub> F ou M

*Si vous souhaitez ajouter des enfants, merci d'utiliser une feuille vierge à la fin de ce questionnaire en indiquant bien le numéro de la question : 44.1*

<sub>2</sub> Non

*Pour les questions qui suivent, aidez-vous du carnet de santé !*

45. **Un frère ou une sœur a-t-il subi une ou plusieurs autres maladies sérieuses (c'est-à-dire avec un diagnostic) pendant la petite enfance du futur diabétique ?**

<sub>1</sub> Oui  <sub>2</sub> Non

**Si oui :**

45.1.

**Quel enfant ?**

**Quelle maladie ?**

.....  
 .....  
 .....

*Si vous souhaitez ajouter des enfants, merci d'utiliser une feuille vierge à la fin de ce questionnaire en indiquant bien le numéro de la question : 45.1*

46. **Un frère ou une sœur a-t-il subi une intervention chirurgicale pendant cette période ?**

<sub>1</sub> Oui  <sub>2</sub> Non

**Si oui :**

46.1.

**Quel enfant ?**

**Quelle intervention ?**

.....  
 .....  
 .....

*Si vous souhaitez ajouter des informations, merci d'utiliser une feuille vierge à la fin de ce questionnaire en indiquant bien le numéro de la question : 46.1*

**Avant le diagnostic du diabète, au moins un des frères et sœurs enfant a-t-il eu :**

(Si plusieurs de vos enfants ont eu une de ces maladies, indiquez la date la plus proche de la naissance du patient)

Oui          Non          Ne sait pas

47. **La rougeole?** .....  1           2           3  
 47.1. **Si oui, à quelle date** (si vous n'avez pas l'information exacte, merci d'indiquer l'année) ?  
 Date : |\_\_|\_\_| |\_\_|\_\_| |\_\_|\_\_|\_\_|\_\_|
48. **Un contact avec un rougeoleux ?** .....  1           2           3  
 48.1. **Si oui, à quelle date** (si vous n'avez pas l'information exacte, merci d'indiquer l'année) ?  
 Date : |\_\_|\_\_| |\_\_|\_\_| |\_\_|\_\_|\_\_|\_\_|
49. **Les oreillons ?** .....  1           2           3  
 49.1. **Si oui, à quelle date** (si vous n'avez pas l'information exacte, merci d'indiquer l'année) ?  
 Date : |\_\_|\_\_| |\_\_|\_\_| |\_\_|\_\_|\_\_|\_\_|
50. **La varicelle ?** .....  1           2           3  
 50.1. **Si oui, à quelle date** (si vous n'avez pas l'information exacte, merci d'indiquer l'année) ?  
 Date : |\_\_|\_\_| |\_\_|\_\_| |\_\_|\_\_|\_\_|\_\_|
51. **La grippe ?** .....  1           2           3  
 51.1. **Si oui, à quelle date** (si vous n'avez pas l'information exacte, merci d'indiquer l'année) ?  
 Date : |\_\_|\_\_| |\_\_|\_\_| |\_\_|\_\_|\_\_|\_\_|
52. **La vaccination contre la rougeole ?** .....  1           2           3  
 52.1. **Si oui, à quelle date** (si vous n'avez pas l'information exacte, merci d'indiquer l'année) ?  
 Date : |\_\_|\_\_| |\_\_|\_\_| |\_\_|\_\_|\_\_|\_\_|

**La structure de la famille**

53. **Les parents ont-ils divorcé ou se sont-ils séparés entre la naissance du patient et le diagnostic de son diabète ?**  
 1 Oui           2 Non      ➔ Allez à la question 53.6 page 12
- 53.1. **Si oui, les parents étaient-ils séparés avec la garde alternée du patient ?**  
 1 Oui           2 Non
- 53.1.1. **Si oui, le patient vivait-il :**  
 1 Uniquement chez sa mère  
 2 Uniquement chez son père  
 3 Autant chez sa mère que chez son père  
 4 Plus fréquemment chez sa mère  
 5 Plus fréquemment chez son père

53.2. **Quelle était l'adresse de la mère ?**

Bâtiment.....  
 Numéro ..... Voie .....  
 Code postal ..... Ville .....  
 Pays .....

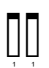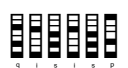

53.3. **Combien de frères et de sœurs vivaient au domicile de la mère durant cette période (ne pas compter le patient) ?**    |\_\_|\_\_| enfants

53.4. **Quelle était l'adresse du père ?**

Bâtiment.....  
Numéro ..... Voie .....  
Code postal ..... Ville .....  
Pays .....

53.5. **Combien de frères et de sœurs vivaient au domicile du père durant cette période (ne pas compter le patient) ?**    |\_\_|\_\_| enfants

➡ Allez à la question 54

53.6. **Quelle était l'adresse des parents ?**

Bâtiment.....  
Numéro ..... Voie .....  
Code postal ..... Ville .....  
Pays .....

### Les proches du patient

54. **Le patient était-il en contact avec un ou plusieurs adultes (autres que les grands-parents) ayant une maladie sérieuse (c'est-à-dire avec un diagnostic) pendant sa petite enfance ?**

54.1.  1 Oui **Si oui, combien ?** |\_\_|

| 54.2. | Si oui : Quelles personnes ? | Quelle maladie ? |
|-------|------------------------------|------------------|
|       | .....                        | .....            |
|       | .....                        | .....            |
|       | .....                        | .....            |
|       | .....                        | .....            |

*Si vous souhaitez ajouter des informations, merci d'utiliser une feuille vierge à la fin de ce questionnaire en indiquant bien le numéro de la question : 54.2*

2 Non

55. **Un ou plusieurs membres de la famille ou proches du patient sont-ils décédés entre la naissance et le début du diabète ?**

55.1.  1 Oui **Si oui, quelle est la cause de ce ou ces décès ?**

.....  
.....  
.....

2 Non

## 2 - AVANT LA NAISSANCE DU FUTUR DIABÉTIQUE

### 2.1 - La famille du patient avant la grossesse

Les grands-parents maternels, oncles ou tantes ont-ils exercé l'une des professions suivantes :

- |                                 | Oui                        | Non                        |
|---------------------------------|----------------------------|----------------------------|
| 56. <b>Agriculteur ?</b> .....  | <input type="checkbox"/> 1 | <input type="checkbox"/> 2 |
| 57. <b>Vétérinaire ?</b> .....  | <input type="checkbox"/> 1 | <input type="checkbox"/> 2 |
| 58. <b>Médecin ?</b> .....      | <input type="checkbox"/> 1 | <input type="checkbox"/> 2 |
| 59. <b>Infirmier(e) ?</b> ..... | <input type="checkbox"/> 1 | <input type="checkbox"/> 2 |
| 60. <b>Coiffeur(se) ?</b> ..... | <input type="checkbox"/> 1 | <input type="checkbox"/> 2 |

61. **Le père du patient portait-il des lunettes ou/et des lentilles de correction de vue?**

- 61.1.  1 Oui **Si oui, quelle était son acuité visuelle corrigée ?**  
 1 10/10     2 9/10     3 8/10     4 7/10     5 moins de 6/10  
 2 Non

62. **Le père du patient était-il myope ?**

- 62.1.  1 Oui **Si oui, connaissez-vous la puissance de sa correction ?**  
 1 Oui **Si oui,** De - 1 à - 3 dioptries    De - 3 à - 6 dioptries    Plus forte que - 6 dioptries  
 62.1.1. Œil droit .....  1     2     3  
 62.1.2. Œil gauche .....  1     2     3  
 2 Non  
 2 Non

### 2.2 - La vie de la mère du patient diabétique avant la grossesse

*Les questions qui suivent concernent la mère biologique du patient diabétique  
 Si sa mère n'est pas sa mère biologique alors, allez directement à la question 199 page 23*

63. **La mère du patient est-elle née :**

- 1 A terme     2 Avant terme

64. **La mère dans l'enfance était-elle ?**

- 1 Très mince-maigre  
 2 Mince  
 3 Normale  
 4 Un peu enveloppée, "ronde"  
 5 En net surpoids

65. **La mère à l'adolescence était-elle ?**

- 1 Très mince-maigre  
 2 Mince  
 3 Normale  
 4 Un peu enveloppée, "ronde"  
 5 En net surpoids

- La mère a-t-elle :** Oui Non
66. **Suivi un régime pour diminuer son poids pendant son enfance ?** .....  1  2
67. **Suivi un régime amaigrissant pendant son adolescence ?** .....  1  2
68. **Suivi un régime amaigrissant pendant sa vie de jeune adulte ?** .....  1  2
69. **La mère a-t-elle été végétarienne pendant une de ces périodes ?** .....  1  2

**La santé de la mère avant qu'elle ne soit enceinte du futur diabétique**

70. **La mère du patient portait-elle avant la grossesse des lunettes ou/et des lentilles de correction de vue?**
- 70.1.  1 Oui **Si oui, quelle était son acuité visuelle corrigée ?**
- 1 10/10  2 9/10  3 8/10  4 7/10  5 moins de 6/10
- 2 Non

71. **La mère du patient était-elle myope ?**
- 71.1.  1 Oui **Si oui, connaissez-vous la puissance de sa correction ?**
- 1 Oui **Si oui,** De - 1 à - 3 dioptries De - 3 à - 6 dioptries Plus forte que - 6 dioptries
- 71.1.1. Œil droit .....  1  2  3
- 71.1.2. Œil gauche .....  1  2  3
- 2 Non
- 2 Non

- La mère du patient avait-elle avant la grossesse :** Oui Non
72. **Une obésité ?** .....  1  2
73. **Un surpoids ?** .....  1  2
74. **De l'asthme ?** .....  1  2

75. **Avant la grossesse la mère avait-elle un diabète ?**
- 75.1.  1 Oui **Si oui, à quel âge a été diagnostiqué ce diabète ?** |\_\_| |\_\_| ans
- 75.2. **était-il traité à l'insuline ?**  1 Oui  2 Non
- 2 Non

76. **Avant la grossesse la mère avait-elle une hypothyroïdie (thyroïdite de Hashimoto) ?**
- 1 Oui  2 Non

77. **Avant la grossesse la mère avait-elle une hyperthyroïdie (maladie de Basedow) ?**
- 1 Oui  2 Non

- La mère avait-elle eu une des maladie suivantes avant la grossesse :** Oui Non
78. **Un syndrome pied-main-bouche (vésicules sur les paumes, les plantes de pieds et dans la bouche) ?** .....  1  2
79. **Une hépatite ?** .....  1  2
80. **Une méningite virale ?** .....  1  2

81. **Avait-elle eu recours à un moyen contraceptif avant cette grossesse ?**
- 81.1.  1 Oui **Si oui, s'agissait-il ?**  1 d'une pilule oestro-progestative
- 2 d'un stérilet
- 3 autre
- 2 Non

## 2.3 - La vie de la mère pendant la grossesse et à la naissance du patient diabétique

*Attention, la grossesse dont il s'agit est celle qui s'est achevée par la naissance du patient diabétique*

### L'alimentation

82. Pendant cette grossesse la mère consommait-elle de la viande (plusieurs réponses possibles)?

- <sub>1</sub> Crue (tartare, carpaccio...)  
<sub>2</sub> Bleue  
<sub>3</sub> Saignante  
<sub>4</sub> A point  
<sub>5</sub> Très cuite  
<sub>6</sub> La mère ne consommait pas de viande pendant cette période

| Pendant cette grossesse la mère consommait-elle : |                                                       | Oui                                   | Non                                   |
|---------------------------------------------------|-------------------------------------------------------|---------------------------------------|---------------------------------------|
| 83.                                               | Des légumes cultivés dans le potager familial ? ..... | <input type="checkbox"/> <sub>1</sub> | <input type="checkbox"/> <sub>2</sub> |
| 84.                                               | Des légumes d'un marché rural ? .....                 | <input type="checkbox"/> <sub>1</sub> | <input type="checkbox"/> <sub>2</sub> |
| 85.                                               | De la charcuterie artisanale ou familiale ? .....     | <input type="checkbox"/> <sub>1</sub> | <input type="checkbox"/> <sub>2</sub> |
| 86.                                               | Des conserves familiales ? .....                      | <input type="checkbox"/> <sub>1</sub> | <input type="checkbox"/> <sub>2</sub> |
| 87.                                               | Du poisson cuit ? .....                               | <input type="checkbox"/> <sub>1</sub> | <input type="checkbox"/> <sub>2</sub> |
| 88.                                               | Du poisson fumé ? .....                               | <input type="checkbox"/> <sub>1</sub> | <input type="checkbox"/> <sub>2</sub> |
| 89.                                               | Du poisson cru ? .....                                | <input type="checkbox"/> <sub>1</sub> | <input type="checkbox"/> <sub>2</sub> |
| 90.                                               | Des coquillages crus (huîtres, palourdes...) ? .....  | <input type="checkbox"/> <sub>1</sub> | <input type="checkbox"/> <sub>2</sub> |
| 91.                                               | Des crustacés ? .....                                 | <input type="checkbox"/> <sub>1</sub> | <input type="checkbox"/> <sub>2</sub> |
| 92.                                               | Des fromages au lait cru ? .....                      | <input type="checkbox"/> <sub>1</sub> | <input type="checkbox"/> <sub>2</sub> |
| 93.                                               | Des pâtisseries à la crème ? .....                    | <input type="checkbox"/> <sub>1</sub> | <input type="checkbox"/> <sub>2</sub> |

94. Pendant cette grossesse la mère mangeait-elle des gâteaux et des sucreries ?

- <sub>1</sub> Plusieurs fois par jour  
<sub>2</sub> Au moins une fois par jour  
<sub>3</sub> Au mois une fois par semaine  
<sub>4</sub> Au moins une fois par mois  
<sub>5</sub> Plus rarement  
<sub>6</sub> Jamais

95. Pendant cette grossesse suivait-elle un régime ?

- 95.1. <sub>1</sub> Oui Si oui, ce régime avait-il pour but de limiter la prise de poids durant la grossesse ?  
<sub>1</sub> Oui <sub>2</sub> Non
- 95.2. <sub>2</sub> Non Si non, même sans régime véritable, la mère avait-elle essayé de ne pas prendre plus de 9-10 kg pendant la grossesse ? <sub>1</sub> Oui <sub>2</sub> Non

96. La mère pensait-elle que prendre trop de poids est mauvais pour la santé (aussi bien la sienne que celle du bébé) ? <sub>1</sub> Oui <sub>2</sub> Non



97. Le médecin qui suivait la grossesse avait-il encouragé la mère à ne pas prendre trop de poids ?

- 1 Oui       2 Non

98. Finalement la prise de poids pendant la grossesse était :

- 1 Inférieure à 10kg  
 2 Entre 10 et 15 kg  
 3 Entre 15 et 20 kg  
 4 Plus de 20 kg

La mère buvait-elle :

Oui Non

99. Du café ? .....  1  2

100. De l'eau du robinet ? .....  1  2

101. De l'eau minérale ? .....  1  2

102. La mère a-t-elle bu de l'alcool pendant la grossesse ?

- 102.1.  1 Oui Si oui :  1 Au moins une fois par jour  
 2 Au moins une fois par semaine  
 3 Au moins une fois par mois  
 4 Moins souvent

2 Non

### L'hygiène

Durant cette grossesse, la mère :

Oui Non

103. Se lavait-elle les mains avant chaque repas ? .....  1  2

104. Se lavait-elle les mains après avoir été aux toilettes ? .....  1  2

105. Utilisait-elle une crème anti-vergetures ? .....  1  2

106. La mère a-t-elle eu une épilation pendant la grossesse (plusieurs réponses possibles) ?

- 106.1.  1 Oui Si oui, comment ?  
 1 Crème dépilatoire  
 2 Rasage  
 3 Epilation à la cire  
 4 Epilateur électrique  
 5 Autres

2 Non

107. La mère s'est-elle fait tatouer pendant cette grossesse ?  1 Oui  2 Non

108. La mère a-t-elle fumé des cigarettes pendant cette grossesse ?

- 108.1.  1 Oui Si oui, comment ?  
 1 Moins de 15 cigarettes par jour  
 2 Plus de 15 cigarettes par jour

2 Non

109. La mère faisait-elle le ménage à la maison ?  1 Oui  2 Non

### Les loisirs

- Durant la grossesse, la mère :** Oui Non
110. Faisait-elle collage, encadrement ou peinture ? .....  1  2
111. A-t-elle été au moins une fois à la piscine ? .....  1  2
112. A-t-elle fait des promenades, des randonnées dans la campagne ? .....  1  2
113. A-t-elle fait des séjours en altitude ? .....  1  2
114. A-t-elle effectué des voyages en avion ? .....  1  2
115. Durant la grossesse, la mère a-t-elle effectué des voyages dans un pays non européen ?  
 1 Oui  2 Non ➡ Allez à la question 116

- Si oui, dans quelle région :** Oui Non
- 115.1. Afrique du nord ? .....  1  2
- 115.2. Reste de l'Afrique ? .....  1  2
- 115.3. Amérique du nord ? .....  1  2
- 115.4. Amérique centrale ou Amérique du sud ? .....  1  2
- 115.5. Asie ? .....  1  2
- 115.6. Océanie ? .....  1  2

- Durant cette grossesse, la mère :** Oui Non
116. Avait-elle un potager familial ? .....  1  2
117. Faisait-elle du jardinage (jardin, terrasse ou balcon) ? .....  1  2
118. Faisait-elle des travaux de bricolage dans la maison ? .....  1  2

### Les animaux familiers

119. Durant cette grossesse, la mère a-t-elle été en contact direct régulier avec un animal ?
- 1 Oui ➡ Allez à la question 119.1
- 2 Non ➡ Allez à la question 121 page 18

- La mère a-t-elle été en contact avec :** Oui Non
- 119.1. Un chien ? .....  1  2
- 119.2. Un rongeur (hamster, chinchilla, mulots, souris, rats...) ? .....  1  2
- 119.3. Une perruche, un mainate, un perroquet ? .....  1  2
- 119.4. Des pigeons ? .....  1  2

- 119.5. La mère a-t-elle été en contact régulier avec un chat ?

- 1 Oui ➡ Allez à la question 119.5.1
- 2 Non ➡ Allez à la question 119.6 page 18

- 119.5.1. La mère changeait-elle la litière du chat elle-même ?  2 Oui  2 Non

- 119.5.2. Ce chat était-il nourri avec (plusieurs réponses possibles) :

- 1 De la viande crue ?
- 2 Des croquettes ?
- 3 De la nourriture en boîte ?

119.6. **Un des animaux familiers (chat, chien, rongeur...) est-il mort pendant la grossesse ?**

1 Oui  2 Non

**La santé de la mère lorsqu'elle était enceinte du futur diabétique**

120. **La mère a-t-elle eu recours à une technique de procréation assistée pour obtenir cette grossesse ?**

1 Oui  2 Non

121. **Où la mère était-elle suivie pour sa grossesse (plusieurs réponses possibles) ?**

1 En cabinet  2 A l'hôpital ou en clinique

122. **La mère a-t-elle eu une prise de sang pendant cette grossesse ?**

122.1.  1 Oui **Si oui, en maternité ?**  1 Oui  2 Non

122.2.  **dans un laboratoire ?**  1 Oui  2 Non

2 Non

123. **La mère a-t-elle eu une amniocentèse ?**  1 Oui  2 Non

124. **La mère prenait-elle des antiémétiques ou antinauséux en début de grossesse ?**  1 Oui  2 Non

125. **La mère a-t-elle été hospitalisée pour des vomissements en début de grossesse ?**  1 Oui  2 Non

126. **Au cours de cette grossesse, la mère a-t-elle eu une mycose génitale ?**

1 Oui  2 Non ➔ *Allez à la question 127*

126.1. **Si oui, a-t-elle reçu un traitement local ?**

126.1.1.  1 Oui **Si oui :**  1 Crème  2 Ovule

2 Non

**Au cours de cette grossesse, la mère a-t-elle eu :**

|                                              | Oui                        | Non                        |
|----------------------------------------------|----------------------------|----------------------------|
| 127. <b>Des saignements génitaux ?</b> ..... | <input type="checkbox"/> 1 | <input type="checkbox"/> 2 |
| 128. <b>Une infection urinaire ?</b> .....   | <input type="checkbox"/> 1 | <input type="checkbox"/> 2 |
| 129. <b>Une fièvre inexplicquée ?</b> .....  | <input type="checkbox"/> 1 | <input type="checkbox"/> 2 |

*Sans toutefois vous livrer à une enquête trop poussée, pouvez-vous porter une attention particulière aux questions suivantes ?*

**Au cours de cette grossesse, la mère a-t-elle eu :**

|                                                                                                                     | Oui                        | Non                        |
|---------------------------------------------------------------------------------------------------------------------|----------------------------|----------------------------|
| 130. <b>Un syndrome pied-main-bouche (vésicules sur les paumes, les plantes de pieds et dans la bouche) ?</b> ..... | <input type="checkbox"/> 1 | <input type="checkbox"/> 2 |
| 131. <b>Une infection respiratoire (bronchite, pneumonie) ou une bronchiolite ?</b> .....                           | <input type="checkbox"/> 1 | <input type="checkbox"/> 2 |
| 132. <b>Une infection de la sphère ORL : otite, sinusite, rhume, angine, laryngite ?</b> .....                      | <input type="checkbox"/> 1 | <input type="checkbox"/> 2 |
| 133. <b>Une diarrhée aiguë avec des vomissements ?</b> .....                                                        | <input type="checkbox"/> 1 | <input type="checkbox"/> 2 |
| 134. <b>Une hépatite ?</b> .....                                                                                    | <input type="checkbox"/> 1 | <input type="checkbox"/> 2 |
| 135. <b>Des épisodes fébriles répétés ?</b> .....                                                                   | <input type="checkbox"/> 1 | <input type="checkbox"/> 2 |
| 136. <b>Une méningite virale ?</b> .....                                                                            | <input type="checkbox"/> 1 | <input type="checkbox"/> 2 |

.....

137. **Au cours de cette grossesse, la mère a-t-elle eu une autre maladie infectieuse ?**

137.1.  1 Oui **Si oui, en quelle saison ?**

1 Printemps

2 Eté

3 Automne

4 Hiver

2 Non

138. **Au cours de sa grossesse, la mère a-t-elle eu une allergie cutanée ?**

138.1.  1 Oui

2 Non

139. **Au cours de sa grossesse, la mère a-t-elle eu de l'hypertension artérielle ?**

139.1.  1 Oui **Si oui, la mère prenait-elle des médicaments antihypertenseurs ?**

1 Oui  2 Non

2 Non

140. **Au cours de sa grossesse, la mère a-t-elle eu une autre maladie ?**

1 Oui  2 Non

141. **Au cours de sa grossesse, la mère a-t-elle eu des soins dentaires ?**

141.1.  1 Oui **Si oui, s'est-elle fait enlever une dent pendant la grossesse ?**

1 Oui  2 Non

2 Non

| <b>Au cours de cette grossesse la mère :</b>                    | Oui                        | Non                        |
|-----------------------------------------------------------------|----------------------------|----------------------------|
| 142. <b>A-t-elle fait une chute avec blessure ?</b> .....       | <input type="checkbox"/> 1 | <input type="checkbox"/> 2 |
| 143. <b>A-t-elle été hospitalisée ?</b> .....                   | <input type="checkbox"/> 1 | <input type="checkbox"/> 2 |
| 144. <b>A-t-elle eu une intervention chirurgicale ?</b> .....   | <input type="checkbox"/> 1 | <input type="checkbox"/> 2 |
| 145. <b>A-t-elle subi une anesthésie générale ?</b> .....       | <input type="checkbox"/> 1 | <input type="checkbox"/> 2 |
| 146. <b>Etait-elle immunisée contre la rubéole ?</b> .....      | <input type="checkbox"/> 1 | <input type="checkbox"/> 2 |
| 147. <b>Etait-elle immunisée contre la toxoplasmose ?</b> ..... | <input type="checkbox"/> 1 | <input type="checkbox"/> 2 |

148. **La mère était-elle diabétique avant la grossesse ?**

148.1.  1 Oui **Dans ce cas:**

1 Etait-elle traitée à l'insuline pendant la grossesse ?

2 Suivait-elle seulement un régime diabétique pendant la grossesse ?

2 Non

| <b>Au cours de cette grossesse la mère :</b>                                                                                   | Oui                        | Non                        |
|--------------------------------------------------------------------------------------------------------------------------------|----------------------------|----------------------------|
| 149. <b>A-t-elle eu un test de dépistage du diabète</b><br><b>(mesure de la glycémie après ingestion d'eau sucrée) ?</b> ..... | <input type="checkbox"/> 1 | <input type="checkbox"/> 2 |
| 150. <b>Avait-elle un "diabète de grossesse" (diabète gestationnel) ?</b> .....                                                | <input type="checkbox"/> 1 | <input type="checkbox"/> 2 |
| 151. <b>A-t-elle eu des insomnies du petit matin ?</b> .....                                                                   | <input type="checkbox"/> 1 | <input type="checkbox"/> 2 |
| 152. <b>A-t-elle pris des médicaments pour s'endormir ?</b> .....                                                              | <input type="checkbox"/> 1 | <input type="checkbox"/> 2 |

153. **Au cours de sa grossesse, la mère a-t-elle pris des médicaments non encore mentionnés ?**

1 Oui  2 Non

154. **Une sage-femme est-elle venue au domicile pendant cette grossesse ?**  1 Oui  2 Non

155. **Pour des raisons professionnelles, la mère a-t-elle rendu visite, à des personnes hospitalisées pendant cette grossesse ?**  
 1 Oui       2 Non
156. **Pour d'autres raisons, la mère a-t-elle rendu visite à une personne hospitalisée pendant cette grossesse ?**  
 1 Oui       2 Non
157. **Y a-t-il eu un autre événement de santé marquant pendant cette grossesse ?**  
 1 Oui       2 Non

### L'accouchement

158. **Y a-t-il eu une menace d'accouchement prématuré ?**  
 158.1.  1 Oui    **Si oui, la mère a-t-elle reçu un traitement pour cela ?**     1 Oui     2 Non  
 2 Non

- | La mère a-t-elle :                                                                                                                                                                                   | Oui                        | Non                        |
|------------------------------------------------------------------------------------------------------------------------------------------------------------------------------------------------------|----------------------------|----------------------------|
| 159. <b>Pris des antibiotiques avant la naissance ?</b> .....                                                                                                                                        | <input type="checkbox"/> 1 | <input type="checkbox"/> 2 |
| 160. <b>Eu une rupture des membranes ?</b> .....                                                                                                                                                     | <input type="checkbox"/> 1 | <input type="checkbox"/> 2 |
| 160.1. <b>Si oui, a-t-elle reçu un traitement pour cela ?</b> <input type="checkbox"/> 1 Oui <input type="checkbox"/> 2 Non                                                                          |                            |                            |
| 161. <b>Eu une anesthésie générale pendant l'accouchement ?</b> .....                                                                                                                                | <input type="checkbox"/> 1 | <input type="checkbox"/> 2 |
| 162. <b>Eu une anesthésie péridurale ?</b> .....                                                                                                                                                     | <input type="checkbox"/> 1 | <input type="checkbox"/> 2 |
| 163. <b>Y a-t-il eu une révision utérine lors de l'accouchement ("main dans l'utérus") ?</b><br><input type="checkbox"/> 1 Oui <input type="checkbox"/> 2 Non <input type="checkbox"/> 3 Ne sait pas |                            |                            |

164. **Comment le travail s'est-il déclenché ?**  
 1 Spontanément  
 164.1.  2 Avec des médicaments ?  
           **Dans ce cas :**  1 Le travail a été déclenché avec ocytocine par voie intraveineuse  
                            2 Le travail a été déclenché par prostaglandines par voie vaginale  
                            3 Autre ou ne sait pas

165. **La mère a-t-elle eu des antibiotiques pendant le travail ?**

- 1 Oui  
 2 Non  
 3 Ne sait pas

166. **La mère a-t-elle accouché ?**

- 166.1.  1 par voie basse  
           166.1.1. **Dans ce cas :**  1 Accouchement par forceps, ventouse  
                                            2 Accouchement spontané  
 2 par césarienne

167. **La mère a-t-elle eu des jumeaux ?**

- 167.1.  1 Oui    **Si oui, les jumeaux étaient-il :**     1 Vrais     2 Faux     3 Ne sait pas  
 2 Non

### La mère après l'accouchement

168. La mère a-t-elle eu des hémorragies génitales après l'accouchement ayant nécessité un traitement ?

1 Oui  2 Non

169. La mère a-t-elle pris des antibiotiques après la naissance ?  1 Oui  2 Non

La mère a-t-elle eu une supplémentation : Oui Non Ne sait pas

170. En polyvitamines ? .....  1  2  3

171. En fer (Tardyferon, Fumafer, Ferrograd) ? .....  1  2  3

172. En calcium ? .....  1  2  3

173. En vitamine D (Uvédose) ? .....  1  2  3

174. En magnésium ? .....  1  2  3

175. Le bébé a-t-il été nourri par allaitement maternel, même mixte ou partiel ?

1 Oui  2 Non ➔ Allez à la question 176

Si oui, la mère a-t-elle :

Oui Non

175.1. Pris une contraception orale pendant l'allaitement ? .....  1  2

175.2. Pris des antibiotiques pendant l'allaitement ? .....  1  2

175.3. Pris d'autres médicaments pendant l'allaitement ? .....  1  2

175.4. Mis de la crème sur les mamelons ? .....  1  2

175.5. Eu des fissures sur les mamelons ? .....  1  2

175.6. Le bébé a-t-il été nourri exclusivement par allaitement maternel (au moins une période) ?

175.6.1.  1 Oui Si oui, quelle a été la durée de l'allaitement maternel exclusif ?

1 moins d'un mois

2 entre un et trois mois

3 entre trois et six mois

4 plus de 6 mois

2 Non

## 2.4 - La famille autour de la mère pendant cette grossesse

### Les autres membres de la famille

176. Pendant cette grossesse, y avait-il un ou plusieurs autres petits enfants de moins de 6 ans à la maison ?

1 Oui  2 Non ➔ Allez à la question 177 page 22

176.1. Si oui, cet ou ces enfants, allaient-ils en crèche ou à la maternelle pendant cette grossesse ?

1 Oui  2 Non

176.2. Un de ces enfants a-t-il été malade pendant cette grossesse ?

176.2.1.  1 Oui Si oui, a-t-il vu un médecin ?  2 Oui  2 Non

176.2.1.1. Si oui, y a-t-il eu un diagnostic ?  1 Oui  2 Non

2 Non

3 Ne se souvient pas

*Sans toutefois vous livrer à une enquête trop poussée, pouvez-vous porter une attention particulière aux questions suivantes ?*

- Pendant cette grossesse, un enfant ou un adulte vivant à la maison a-t-il eu :**
- |                                                                                                                            |                                |                                |
|----------------------------------------------------------------------------------------------------------------------------|--------------------------------|--------------------------------|
|                                                                                                                            | Oui                            | Non                            |
| 177. La rougeole ? .....                                                                                                   | <input type="checkbox"/> 1     | <input type="checkbox"/> 2     |
| 178. Les oreillons ? .....                                                                                                 | <input type="checkbox"/> 1     | <input type="checkbox"/> 2     |
| 179. La varicelle ? .....                                                                                                  | <input type="checkbox"/> 1     | <input type="checkbox"/> 2     |
| 180. Un syndrome pied-main-bouche (vésicules sur les paumes, les plantes de pieds et dans la bouche) ? .....               | <input type="checkbox"/> 1     | <input type="checkbox"/> 2     |
| 181. La grippe ? .....                                                                                                     | <input type="checkbox"/> 1     | <input type="checkbox"/> 2     |
| 182. Une infection respiratoire ou une bronchiolite ? .....                                                                | <input type="checkbox"/> 1     | <input type="checkbox"/> 2     |
| 183. Une hépatite ? .....                                                                                                  | <input type="checkbox"/> 1     | <input type="checkbox"/> 2     |
| 184. Des épisodes fébriles répétés ? .....                                                                                 | <input type="checkbox"/> 1     | <input type="checkbox"/> 2     |
| 185. Une méningite virale ? .....                                                                                          | <input type="checkbox"/> 1     | <input type="checkbox"/> 2     |
| 186. Un enfant ou un adulte vivant à la maison a-t-il eu une diarrhée aiguë avec des vomissements ?                        |                                |                                |
| 186.1. <input type="checkbox"/> 1 Oui <b>Si oui, d'été ?</b> <input type="checkbox"/> 1 Oui <input type="checkbox"/> 2 Non |                                |                                |
| 186.2. <b>d'hiver ?</b> <input type="checkbox"/> 1 Oui <input type="checkbox"/> 2 Non                                      |                                |                                |
| <input type="checkbox"/> 2 Non                                                                                             |                                |                                |
| <input type="checkbox"/> 3 Ne se souvient pas                                                                              |                                |                                |
| 187. Un médecin est-il venu au domicile pendant cette grossesse ?                                                          | <input type="checkbox"/> 1 Oui | <input type="checkbox"/> 2 Non |
| 188. Une infirmière est-elle venue au domicile pendant cette grossesse ?                                                   | <input type="checkbox"/> 1 Oui | <input type="checkbox"/> 2 Non |

*Sans toutefois vous livrer à une enquête trop poussée, pouvez-vous porter une attention particulière aux questions suivantes ?*

- Pendant cette grossesse, vous rappelez-vous si dans l'entourage des parents ou des enfants, une personne a eu :**
- |                                                                                                                                             |                            |                            |                            |
|---------------------------------------------------------------------------------------------------------------------------------------------|----------------------------|----------------------------|----------------------------|
|                                                                                                                                             | Oui                        | Non                        | Ne sait pas                |
| 189. La rougeole ? .....                                                                                                                    | <input type="checkbox"/> 1 | <input type="checkbox"/> 2 | <input type="checkbox"/> 3 |
| 190. Les oreillons ? .....                                                                                                                  | <input type="checkbox"/> 1 | <input type="checkbox"/> 2 | <input type="checkbox"/> 3 |
| 191. La varicelle ? .....                                                                                                                   | <input type="checkbox"/> 1 | <input type="checkbox"/> 2 | <input type="checkbox"/> 3 |
| 192. Un syndrome pied-main-bouche (vésicules sur les paumes, les plantes de pieds et dans la bouche) ? .....                                | <input type="checkbox"/> 1 | <input type="checkbox"/> 2 | <input type="checkbox"/> 3 |
| 193. Une infection respiratoire ou une bronchiolite ? .....                                                                                 | <input type="checkbox"/> 1 | <input type="checkbox"/> 2 | <input type="checkbox"/> 3 |
| 194. La grippe ? .....                                                                                                                      | <input type="checkbox"/> 1 | <input type="checkbox"/> 2 | <input type="checkbox"/> 3 |
| 195. Une hépatite ? .....                                                                                                                   | <input type="checkbox"/> 1 | <input type="checkbox"/> 2 | <input type="checkbox"/> 3 |
| 196. Des épisodes fébriles répétés ? .....                                                                                                  | <input type="checkbox"/> 1 | <input type="checkbox"/> 2 | <input type="checkbox"/> 3 |
| 197. Une méningite virale ? .....                                                                                                           | <input type="checkbox"/> 1 | <input type="checkbox"/> 2 | <input type="checkbox"/> 3 |
| 198. Vous rappelez-vous si <u>dans l'entourage</u> des parents ou des enfants, une personne a eu une diarrhée aiguë avec des vomissements ? |                            |                            |                            |
| 198.1. <input type="checkbox"/> 1 Oui <b>Si oui, d'été ?</b> <input type="checkbox"/> 1 Oui <input type="checkbox"/> 2 Non                  |                            |                            |                            |
| 198.2. <b>d'hiver ?</b> <input type="checkbox"/> 1 Oui <input type="checkbox"/> 2 Non                                                       |                            |                            |                            |
| <input type="checkbox"/> 2 Non                                                                                                              |                            |                            |                            |

### 3 - LORSQUE LE FUTUR DIABÉTIQUE ÉTAIT UN BÉBÉ

Aidez-vous du **carnet de santé** pour répondre aux questions suivantes !

199. **Comment le bébé est-il né ?**       1 Normalement       2 Par le siège       2 Ne sait pas

200. **Le bébé est-il né à terme ?**       1 Oui       2 Non

**Le bébé a-t-il :**      Oui      Non

201. **Eu une "souffrance périnatale" (avec hospitalisation) ?** .....  1       2

202. **Reçu une perfusion peu après la naissance ?** .....  1       2

203. **Reçu un gavage alimentaire par sonde ?** .....  1       2

204. **Eu la jaunisse ?** .....  1       2

205. **Eu une infection néonatale ?** .....  1       2

206. **Le bébé a-t-il eu d'autres problèmes médicaux à la naissance ?**       1 Oui       2 Non

207. **Le bébé a-t-il eu des problèmes de peau ?**

207.1.  1 Oui      **Si oui (plusieurs réponses possibles) :**

1 Eczéma ?

2 Boutons ou pustules surinfectées ?

3 Ni l'un ni l'autre

2 Non

#### Hygiène

208. **Le bébé était-il baigné et lavé au savon ou au gel ?** .....  1       2

209. **La mère lui mettait-elle des crèmes, des laits corporels ?** .....  1       2

210. **La mère utilisait-elle un mouche-bébé ?** .....  1       2

211. **Le bébé allait-il à la piscine (bébé nageur...) ?** .....  1       2

#### Alimentation

212. **Le bébé prenait-il un lait spécial sans protéines de lait de vache (allergie, intolérance) ?**

212.1.  1 Oui      **Si oui, était-ce un lait aux protéines de soja ?**       1 Oui       2 Non

2 Non

213. **Avait-il changé plusieurs fois de marque de lait ?**       1 Oui       2 Non

214. **L'eau consommée par le bébé était l'eau du robinet exclusivement ?**       1 Oui       2 Non

215. **A quel âge a-t-il commencé à manger d'autres aliments que le lait (légumes ou fruits ou viande) ?**

1 avant 4 mois

2 entre 4 et 5 mois

3 entre 5 et 6 mois

4 après 6 mois



216. **Le bébé consommait-il des petits pots du commerce ?**

216.1.  1 Oui **Si oui, en quelle quantité ?**

1 Plus de 4 par jour

2 Plus de 2 par jour

3 Moins de 2 petits pots par jour

2 Non

217. **Le bébé consommait-il des petits pots de fruits du commerce ?**

217.1.  1 Oui **Si oui, en quelle quantité ?**

1 Plus de 4 par jour

2 Plus de 2 par jour

3 Moins de 2 petits pots par jour

2 Non

218. **Le bébé consommait-il des petits pots de fruits faits à la maison ?**

218.1.  1 Oui **Si oui, en quelle quantité ?**

1 Plus de 4 par jour

2 Plus de 2 par jour

3 Moins de 2 petits pots par jour

2 Non

219. **Aimait-il particulièrement les petits pots contenant des aliments sucrés par rapports aux aliments non sucrés ?**  1 Oui  2 Non

220. **Le patient avait-il bon appétit, diriez-vous qu'il était :**

1 Gros mangeur

2 Normal

3 Petit mangeur

## 4 - LA VIE MÉDICALE DU FUTUR DIABÉTIQUE

### 4.1 - Vie médicale du patient avant le diabète

*Aidez-vous de votre mémoire et du carnet de santé : répondez "spontanément", comme la mémoire vous revient, sans vous mettre sous pression pour fournir des réponses "parfaites"*

221. **Le patient, bébé ou petit enfant avait-il eu une brûlure ?**  1 Oui  2 Non

222. **Le patient, bébé ou petit enfant avait-il eu un accident (chute) ?**

222.1.  1 Oui **Si oui : avec traumatisme crânien ?**  1 Oui  2 Non

222.2. **avec fracture osseuse ?**  1 Oui  2 Non

2 Non

**Le patient a-t-il pris, entre sa naissance et la découverte de son diabète :**

|                                                                                                                                | Souvent<br>5 fois par an ou<br>plus souvent | Assez souvent<br>3 à 4 fois par an | Rarement<br>1 ou 2 fois par an | Jamais                         |
|--------------------------------------------------------------------------------------------------------------------------------|---------------------------------------------|------------------------------------|--------------------------------|--------------------------------|
| 223. <b>Du paracétamol (Doliprane, Efferalgan...), de l'ibuprofène (Advyl, Nurofen...) ou de l'aspirine (Aspegic...) .....</b> | <input type="checkbox"/> 1                  | <input type="checkbox"/> 2         | <input type="checkbox"/> 3     | <input type="checkbox"/> 4     |
| 224. <b>Un anti-inflammatoire stéroïdien, un corticoïde : Solupred, Celestene, Cortancyl.....</b>                              | <input type="checkbox"/> 1                  | <input type="checkbox"/> 2         | <input type="checkbox"/> 3     | <input type="checkbox"/> 4     |
| 225. <b>Un antibiotique : Amoxicilline, Clamoxil, Orelox, Augmentin, Zithromax.....</b>                                        | <input type="checkbox"/> 1                  | <input type="checkbox"/> 2         | <input type="checkbox"/> 3     | <input type="checkbox"/> 4     |
| 226. <b>Un médicament contre les virus : Zovirax, Tamiflu.....</b>                                                             | <input type="checkbox"/> 1                  | <input type="checkbox"/> 2         | <input type="checkbox"/> 3     | <input type="checkbox"/> 4     |
| 227. <b>Un antifongique contre le muguet : Daktarin, Mycostatine.....</b>                                                      | <input type="checkbox"/> 1                  | <input type="checkbox"/> 2         | <input type="checkbox"/> 3     | <input type="checkbox"/> 4     |
| 228. <b>Un médicament contre les allergies : Atarax, Polaramine, Primalan.....</b>                                             | <input type="checkbox"/> 1                  | <input type="checkbox"/> 2         | <input type="checkbox"/> 3     | <input type="checkbox"/> 4     |
| 229. <b>Un médicament contre la toux : Toplexil, Tussilene, Mucomyst.....</b>                                                  | <input type="checkbox"/> 1                  | <input type="checkbox"/> 2         | <input type="checkbox"/> 3     | <input type="checkbox"/> 4     |
| 230. <b>Un bronchodilatateur : Ventoline, Serevent.....</b>                                                                    | <input type="checkbox"/> 1                  | <input type="checkbox"/> 2         | <input type="checkbox"/> 3     | <input type="checkbox"/> 4     |
| 231. <b>Un médicament contre les brûlures d'estomac, l'acidité gastrique : Mopral (Omeprazol), Ranitidine.</b>                 | <input type="checkbox"/> 1                  | <input type="checkbox"/> 2         | <input type="checkbox"/> 3     | <input type="checkbox"/> 4     |
| 232. <b>Un médicament contre les maux de ventre : Debridat.....</b>                                                            | <input type="checkbox"/> 1                  | <input type="checkbox"/> 2         | <input type="checkbox"/> 3     | <input type="checkbox"/> 4     |
| 233. <b>Un antidiarrhéique : Ultralevure, Lactéol.....</b>                                                                     | <input type="checkbox"/> 1                  | <input type="checkbox"/> 2         | <input type="checkbox"/> 3     | <input type="checkbox"/> 4     |
| 234. <b>Un antidiarrhéique : Imodium, Tiorfan.....</b>                                                                         | <input type="checkbox"/> 1                  | <input type="checkbox"/> 2         | <input type="checkbox"/> 3     | <input type="checkbox"/> 4     |
| 235. <b>Le patient avait-il eu des poux ?</b> <input type="checkbox"/> 1 Oui <input type="checkbox"/> 2 Non                    |                                             |                                    |                                |                                |
| 236. <b>Le patient avait-il eu des parasites digestifs (ascaris, oxyures) ?</b>                                                |                                             | <input type="checkbox"/> 1 Oui     |                                | <input type="checkbox"/> 2 Non |

237. **Le patient était-il en contact avec la terre (jardin, bac à sable...) avant la survenue du diabète ?**

- 1 Tous les jours
- 2 Au moins une fois par semaine
- 3 Au moins une fois par mois
- 4 Plus rarement
- 5 Pendant les vacances seulement
- 6 Jamais

238. **Le patient avait-il été chez le dentiste avant la survenue du diabète ?**

238.1.  1 Oui **Si oui, combien de fois ?**

- 1 1 fois
- 2 2 fois
- 3 Plus de 2 fois

2 Non

239. **Combien de fois par jour se brossait-il les dents ?**

- 1 2 fois par jour
- 2 1 fois
- 3 Moins

240. **Le patient portait-il des lunettes ou/et des lentilles de correction de vue?**

240.1.  1 Oui **Si oui, quelle était son acuité visuelle corrigée ?**

- 1 10/10
- 2 9/10
- 3 8/10
- 4 7/10
- 5 moins de 6/10

2 Non

241. **Le patient était-il myope ?**

1 Oui **Si oui, quelle est la puissance de sa correction ?**

De - 1 à - 3 dioptries      De - 3 à - 6 dioptries      Plus forte que - 6 dioptries

241.1. Œil droit .....  1

2

3

241.2. Œil gauche .....  1

2

3

2 Non

242. **Diriez-vous que le futur diabétique était :**

- 1 "Tout le temps malade" (rhumes, rhinopharyngites, etc)
- 2 Ou plutôt "jamais malade"
- 3 Ni l'un ni l'autre

## 4.2 - Maladies infectieuses du patient avant le diagnostic du diabète

*Les questions qui suivent concernent les vaccins, aidez-vous du carnet de santé !*

243. **Le vaccin combiné DTCPH (Infanrix Quinta, Pentacoc, Pentavac, Tetravac acellulaire...) a été fait :**

- 1 A la date normale
- 2 Retardé par de la fièvre
- 3 Non fait
- 4 Ne sait pas

244. **Le vaccin contre les pneumocoques Prévenar a-t-il été fait à deux mois (s'il a été fait après l'âge de deux mois répondez «Non») ?**

- 1 Oui
- 2 Non
- 3 Ne sait pas

245. **Le vaccin hépatite B (Engerix, Genhevac B, Hbvaxpro 5...) a-t-il été fait à deux mois (s'il a été fait après l'âge de deux mois répondez «Non») ?** <sub>1</sub> Oui <sub>2</sub> Non <sub>3</sub> Ne sait pas

**Le patient a-t-il eu avant le diagnostic du diabète :** Oui Non Ne sait pas

246. **Le vaccin ROR (rougeole-oreillons-rubéole) ?** ..... <sub>1</sub> <sub>2</sub> <sub>3</sub>

247. **Le vaccin de l'hépatite A (Havrix, Twinrix, Avaxim, Tyavax...) ?** ..... <sub>1</sub> <sub>2</sub> <sub>3</sub>

248. **Le vaccin contre la fièvre jaune (Stamaril...) ?** ..... <sub>1</sub> <sub>2</sub> <sub>3</sub>

249. **Le vaccin « méningocoques » (Meninvact, Memomune, Vaccin méningococcique A + C...) ?** ..... <sub>1</sub> <sub>2</sub> <sub>3</sub>

250. **Un autre vaccin de voyageur (typhoïde, encéphalite à tiques...) ?** ..... <sub>1</sub> <sub>2</sub> <sub>3</sub>

*Sans toutefois vous livrer à une enquête trop poussée, pouvez-vous porter une attention particulière aux questions suivantes qui concernent des virus qui ont été incriminés dans le diabète ?*

**Le patient, avant le diagnostic du diabète a-t-il eu :** Oui Non Ne sait pas

251. **La roséole ou exanthème subit, la 5e maladie ?** ..... <sub>1</sub> <sub>2</sub> <sub>3</sub>

252. **Le patient a-t-il eu une éruption fébrile (boutons ou plaques rouges avec de la fièvre) non expliquée ?** ..... <sub>1</sub> <sub>2</sub> <sub>3</sub>

253. **Etait-il arrivé au patient de se mettre à vomir plusieurs fois, par exemple pendant une demi-journée, sans raison apparente ?** ..... <sub>1</sub> <sub>2</sub> <sub>3</sub>

254. **Un syndrome pied-main-bouche (éruption des paumes et des plantes et bulles dans la bouche) ?** ..... <sub>1</sub> <sub>2</sub> <sub>3</sub>

255. **Une infection respiratoire ou une bronchiolite ?** ..... <sub>1</sub> <sub>2</sub> <sub>3</sub>

256. **Le patient a-t-il eu une pancréatite hospitalisée ?** ..... <sub>1</sub> <sub>2</sub> <sub>3</sub>

257. **Une hépatite ?** ..... <sub>1</sub> <sub>2</sub> <sub>3</sub>

258. **Des épisodes fébriles répétés ?** ..... <sub>1</sub> <sub>2</sub> <sub>3</sub>

259. **Une méningite virale ?** ..... <sub>1</sub> <sub>2</sub> <sub>3</sub>

260. **Le patient a-t-il eu une diarrhée aiguë avec des vomissements ?**

<sub>1</sub> Oui **Si oui :** Oui Non Ne sait pas

260.1. **durant plus de 5 jours avec fièvre ?** <sub>1</sub> <sub>2</sub> <sub>3</sub>

260.2. **d'hiver ?** <sub>1</sub> <sub>2</sub> <sub>3</sub>

260.3. **d'été ?** <sub>1</sub> <sub>2</sub> <sub>3</sub>

260.4. **dans un contexte de diarrhée familiale ?** <sub>1</sub> <sub>2</sub> <sub>3</sub>

<sub>2</sub> Non

.....

261. **Avant le diagnostic du diabète, le patient est-il allé à la crèche ?**

261.1. <sub>1</sub> Oui **Si oui, y a-t-il eu une méningite chez un autre enfant de la crèche ?**

<sub>1</sub> Oui <sub>2</sub> Non <sub>3</sub> Ne sait pas

261.2. **y a-t-il eu une autre épidémie (maladie contagieuse) dans la crèche ?**

<sub>1</sub> Oui <sub>2</sub> Non <sub>3</sub> Ne sait pas

<sub>2</sub> Non

262. **Avant le diagnostic du diabète, le patient est-il allé à la maternelle ?**

262.1. <sub>1</sub> Oui **Si oui, y a-t-il eu une méningite chez un autre enfant de la maternelle ?**

<sub>1</sub> Oui <sub>2</sub> Non <sub>3</sub> Ne sait pas

262.2. **y a-t-il eu une autre épidémie (maladie contagieuse) dans la maternelle ?**

<sub>1</sub> Oui <sub>2</sub> Non <sub>3</sub> Ne sait pas

<sub>2</sub> Non

263. **Le patient avait-il été mordu par un animal ?**

263.1. <sub>1</sub> Oui **Si oui : lequel ?** <sub>1</sub> Un chat <sub>2</sub> Un chien <sub>3</sub> Un autre animal

<sub>2</sub> Non

264. **Le patient avait-il été vacciné contre la rage ?** <sub>1</sub> Oui <sub>2</sub> Non

265. **Le patient avait-il déjà été griffé par un animal ?**

265.1. <sub>1</sub> Oui **Si oui : lequel ?** <sub>1</sub> Un chat <sub>2</sub> Un autre animal

<sub>2</sub> Non

266. **Le patient avait-il tendance à être piqué par les moustiques ?** <sub>1</sub> Oui <sub>2</sub> Non

267. **Avait-il été mordu par une araignée ayant laissé une marque nette (marque rouge douloureuse ou non) ?** <sub>1</sub> Oui <sub>2</sub> Non

268. **Avait-il été mordu par une tique ayant laissé une marque nette (marque rouge douloureuse ou non) ?**

<sub>1</sub> Oui <sub>2</sub> Non

269. **Avait-il été piqué par un animal ayant laissé une marque nette (marque rouge douloureuse ou non) ?**

269.1. <sub>1</sub> Oui **Si oui, lequel ?**

<sub>1</sub> Une guêpe <sub>2</sub> Une abeille <sub>3</sub> Un autre insecte <sub>4</sub> Un poisson

<sub>2</sub> Non

270. **Le patient avait-t-il été protégé par des traitements répulsifs anti-moustiques (crèmes, spray...) ?**

<sub>1</sub> Oui <sub>2</sub> Non

271. **Le patient avait-t-il été traité avec des pommades aux corticoïdes ?** <sub>1</sub> Oui <sub>2</sub> Non

**Le patient a-t-il eu une conjonctivite (oeil rouge, oeil sale) :** Oui Non Ne sait pas

272. **Immédiatement après la naissance ?** ..... <sub>1</sub> <sub>2</sub> <sub>3</sub>

273. **A distance de la naissance ?** ..... <sub>1</sub> <sub>2</sub> <sub>3</sub>

274. **Le patient a-t-il été traité par un collyre ?** ..... <sub>1</sub> <sub>2</sub> <sub>3</sub>

275. **Dans sa première année, le patient a-t-il eu au moins une infection ORL : otite, rhinite, rhinopharyngite...?**

<sub>1</sub> Non <sub>2</sub> 1 ou 2 <sub>3</sub> Plus de 2 <sub>4</sub> Ne sait pas

276. **Dans sa première année, le patient a-t-il eu des crises de toux ?**

276.1. <sub>1</sub> Oui **Si oui, a-t-il toussé avec des rejets ?** <sub>1</sub> Oui <sub>2</sub> Non

<sub>2</sub> Non

<sub>3</sub> Ne sait pas

| Entre sa naissance et le diagnostic du diabète, le patient :                                   | Oui                                                                                      | Non                                       | Ne sait pas                           |
|------------------------------------------------------------------------------------------------|------------------------------------------------------------------------------------------|-------------------------------------------|---------------------------------------|
| 277. <b>A-t-il eu souvent le nez qui coulait ?</b> .....                                       | <input type="checkbox"/> <sub>1</sub>                                                    | <input type="checkbox"/> <sub>2</sub>     | <input type="checkbox"/> <sub>3</sub> |
| 278. <b>A-t-il eu un gros rhume avec fièvre pendant plus de 2 jours ?</b> .....                | <input type="checkbox"/> <sub>1</sub>                                                    | <input type="checkbox"/> <sub>2</sub>     | <input type="checkbox"/> <sub>3</sub> |
| 279. <b>Ronflait-il la nuit ?</b> .....                                                        | <input type="checkbox"/> <sub>1</sub>                                                    | <input type="checkbox"/> <sub>2</sub>     | <input type="checkbox"/> <sub>3</sub> |
| 280. <b>A-t-il été opéré des végétations ?</b> .....                                           | <input type="checkbox"/> <sub>1</sub>                                                    | <input type="checkbox"/> <sub>2</sub>     | <input type="checkbox"/> <sub>3</sub> |
| 281. <b>A-t-il été opéré des amygdales ?</b> .....                                             | <input type="checkbox"/> <sub>1</sub>                                                    | <input type="checkbox"/> <sub>2</sub>     | <input type="checkbox"/> <sub>3</sub> |
| <b>282. Entre sa naissance et le diagnostic du diabète, le patient a-t-il eu des angines ?</b> |                                                                                          |                                           |                                       |
| 282.1. <input type="checkbox"/> <sub>1</sub> Oui                                               | <b>Si oui, le patient a-t-il eu des angines avec test de dépistage du streptocoque ?</b> |                                           |                                       |
|                                                                                                | <input type="checkbox"/> <sub>1</sub> Oui                                                | <input type="checkbox"/> <sub>2</sub> Non |                                       |
| 282.2.                                                                                         | <b>le patient a-t-il eu des angines traitées avec des antibiotiques ?</b>                |                                           |                                       |
|                                                                                                | <input type="checkbox"/> <sub>1</sub> Oui                                                | <input type="checkbox"/> <sub>2</sub> Non |                                       |
|                                                                                                | <input type="checkbox"/> <sub>2</sub> Non                                                |                                           |                                       |
|                                                                                                | <input type="checkbox"/> <sub>3</sub> Ne sait pas                                        |                                           |                                       |

| Entre sa naissance et le diagnostic du diabète :                                             | Oui                                   | Non                                   | Ne sait pas                           |
|----------------------------------------------------------------------------------------------|---------------------------------------|---------------------------------------|---------------------------------------|
| 283. <b>Le patient a-t-il eu des paracentèses (otites) ?</b> .....                           | <input type="checkbox"/> <sub>1</sub> | <input type="checkbox"/> <sub>2</sub> | <input type="checkbox"/> <sub>3</sub> |
| 284. <b>Lui a-t-on posé des yoyos dans les oreilles ?</b> .....                              | <input type="checkbox"/> <sub>1</sub> | <input type="checkbox"/> <sub>2</sub> | <input type="checkbox"/> <sub>3</sub> |
| 285. <b>Le patient a-t-il eu une laryngite ?</b> .....                                       | <input type="checkbox"/> <sub>1</sub> | <input type="checkbox"/> <sub>2</sub> | <input type="checkbox"/> <sub>3</sub> |
| 286. <b>Le patient a-t-il eu des ganglions autour de la gorge (au niveau du cou) ?</b> ..... | <input type="checkbox"/> <sub>1</sub> | <input type="checkbox"/> <sub>2</sub> | <input type="checkbox"/> <sub>3</sub> |
| 287. <b>Le patient a-t-il eu l'asthme du nourrisson ?</b> .....                              | <input type="checkbox"/> <sub>1</sub> | <input type="checkbox"/> <sub>2</sub> | <input type="checkbox"/> <sub>3</sub> |
| 288. <b>Le patient a-t-il eu une radio des poumons ?</b> .....                               | <input type="checkbox"/> <sub>1</sub> | <input type="checkbox"/> <sub>2</sub> | <input type="checkbox"/> <sub>3</sub> |

| Le patient a-t-il eu :                                                                                                                                                                 | Oui                                                   | Non                                   | Ne sait pas                           |
|----------------------------------------------------------------------------------------------------------------------------------------------------------------------------------------|-------------------------------------------------------|---------------------------------------|---------------------------------------|
| 289. <b>Un traitement des diarrhées par Smecta ?</b> .....                                                                                                                             | <input type="checkbox"/> <sub>1</sub>                 | <input type="checkbox"/> <sub>2</sub> | <input type="checkbox"/> <sub>3</sub> |
| 290. <b>Des antidiarrhéiques ?</b> .....                                                                                                                                               | <input type="checkbox"/> <sub>1</sub>                 | <input type="checkbox"/> <sub>2</sub> | <input type="checkbox"/> <sub>3</sub> |
| 291. <b>Des antibiotiques pour la diarrhée ?</b> .....                                                                                                                                 | <input type="checkbox"/> <sub>1</sub>                 | <input type="checkbox"/> <sub>2</sub> | <input type="checkbox"/> <sub>3</sub> |
| 292. <b>Une analyse de germes de virus dans les selles, une coproculture ?</b> .....                                                                                                   | <input type="checkbox"/> <sub>1</sub>                 | <input type="checkbox"/> <sub>2</sub> | <input type="checkbox"/> <sub>3</sub> |
| 293. <b>Des douleurs abdominales («coliques», cris) ?</b> .....                                                                                                                        | <input type="checkbox"/> <sub>1</sub>                 | <input type="checkbox"/> <sub>2</sub> | <input type="checkbox"/> <sub>3</sub> |
| 294. <b>Le patient a-t-il eu des infections urinaires ?</b> .....                                                                                                                      | <input type="checkbox"/> <sub>1</sub>                 | <input type="checkbox"/> <sub>2</sub> | <input type="checkbox"/> <sub>3</sub> |
| 295. <b>Le patient a-t-il été circoncis ?</b> <input type="checkbox"/> <sub>1</sub> Oui <input type="checkbox"/> <sub>2</sub> Non <input type="checkbox"/> <sub>3</sub> Non applicable |                                                       |                                       |                                       |
| <b>296. Le patient a-t-il eu d'autres maladies infectieuses ?</b>                                                                                                                      |                                                       |                                       |                                       |
| 296.1. <input type="checkbox"/> <sub>1</sub> Oui                                                                                                                                       | <b>Si oui, plutôt à quelle saison ?</b>               |                                       |                                       |
|                                                                                                                                                                                        | <input type="checkbox"/> <sub>1</sub> Printemps       |                                       |                                       |
|                                                                                                                                                                                        | <input type="checkbox"/> <sub>2</sub> Eté             |                                       |                                       |
|                                                                                                                                                                                        | <input type="checkbox"/> <sub>3</sub> Automne         |                                       |                                       |
|                                                                                                                                                                                        | <input type="checkbox"/> <sub>4</sub> Hiver           |                                       |                                       |
|                                                                                                                                                                                        | <input type="checkbox"/> <sub>5</sub> N'importe quand |                                       |                                       |
|                                                                                                                                                                                        | <input type="checkbox"/> <sub>2</sub> Non             |                                       |                                       |

## 5 - LES HABITUDES DE VIE ET L'ENVIRONNEMENT DU FUTUR DIABÉTIQUE

### 5.1 - Alimentation du patient avant la découverte du diabète

297. Le patient aimait-il le sucre ? <sub>1</sub> Beaucoup <sub>2</sub> Un peu <sub>3</sub> Pas du tout

298. Le patient aimait-il le sel ? <sub>1</sub> Beaucoup <sub>2</sub> Un peu <sub>3</sub> Pas du tout

#### Viandes

299. A quel âge le patient a-t-il commencé à manger de la viande de boucherie ?  
<sub>1</sub> Avant 6 mois <sub>2</sub> Entre 6 mois et un an <sub>3</sub> Après un an <sub>4</sub> Ne sait pas

| Avant le diagnostic du diabète le patient consommait-il :                                                     | Oui                                   | Non                                   | Ne sait pas                           |
|---------------------------------------------------------------------------------------------------------------|---------------------------------------|---------------------------------------|---------------------------------------|
| 300. Du bœuf ? .....                                                                                          | <input type="checkbox"/> <sub>1</sub> | <input type="checkbox"/> <sub>2</sub> | <input type="checkbox"/> <sub>3</sub> |
| 301. Du mouton ? .....                                                                                        | <input type="checkbox"/> <sub>1</sub> | <input type="checkbox"/> <sub>2</sub> | <input type="checkbox"/> <sub>3</sub> |
| 302. De la volaille ? .....                                                                                   | <input type="checkbox"/> <sub>1</sub> | <input type="checkbox"/> <sub>2</sub> | <input type="checkbox"/> <sub>3</sub> |
| 303. Du poulet ? .....                                                                                        | <input type="checkbox"/> <sub>1</sub> | <input type="checkbox"/> <sub>2</sub> | <input type="checkbox"/> <sub>3</sub> |
| 304. Du lapin ? .....                                                                                         | <input type="checkbox"/> <sub>1</sub> | <input type="checkbox"/> <sub>2</sub> | <input type="checkbox"/> <sub>3</sub> |
| 305. Du porc ? .....                                                                                          | <input type="checkbox"/> <sub>1</sub> | <input type="checkbox"/> <sub>2</sub> | <input type="checkbox"/> <sub>3</sub> |
| 306. Du cheval ? .....                                                                                        | <input type="checkbox"/> <sub>1</sub> | <input type="checkbox"/> <sub>2</sub> | <input type="checkbox"/> <sub>3</sub> |
| 307. De la charcuterie froide (pâté, saucisson, jambon)<br>achetée <u>en grande ou petite surface</u> ? ..... | <input type="checkbox"/> <sub>1</sub> | <input type="checkbox"/> <sub>2</sub> | <input type="checkbox"/> <sub>3</sub> |
| 308. De la charcuterie type saucisse ou boudin achetée<br>en <u>boucherie-charcuterie</u> ? .....             | <input type="checkbox"/> <sub>1</sub> | <input type="checkbox"/> <sub>2</sub> | <input type="checkbox"/> <sub>3</sub> |
| 309. De la charcuterie type <u>saucisse industrielle</u> ? .....                                              | <input type="checkbox"/> <sub>1</sub> | <input type="checkbox"/> <sub>2</sub> | <input type="checkbox"/> <sub>3</sub> |
| 310. De la charcuterie <u>préparée à la maison ou familiale</u> ? .....                                       | <input type="checkbox"/> <sub>1</sub> | <input type="checkbox"/> <sub>2</sub> | <input type="checkbox"/> <sub>3</sub> |
| 311. Du gibier (lièvre, sanglier, cerf) ? .....                                                               | <input type="checkbox"/> <sub>1</sub> | <input type="checkbox"/> <sub>2</sub> | <input type="checkbox"/> <sub>3</sub> |
| 312. Du gibier à plumes (faisan, perdreaux, caille, etc) ? .....                                              | <input type="checkbox"/> <sub>1</sub> | <input type="checkbox"/> <sub>2</sub> | <input type="checkbox"/> <sub>3</sub> |

#### Poissons, coquillages, crustacés

313. Avec quelle fréquence le patient consommait-il du poisson frais ?

- <sub>1</sub> Plusieurs fois par semaine
- <sub>2</sub> Au moins une fois par semaine
- <sub>3</sub> Au moins une fois par mois
- <sub>4</sub> Plus rarement
- <sub>5</sub> Jamais ➡ Allez directement à la question 316 page 31

314. Le patient consommait-il du poisson de rivière frais ?

- <sub>1</sub> Plusieurs fois par semaine
- <sub>2</sub> Au moins une fois par semaine
- <sub>3</sub> Au moins une fois par mois
- <sub>4</sub> Plus rarement
- <sub>5</sub> Jamais ➡ Allez directement à la question 315 page 31

314.1. Le consommait-il parfois cru ? <sub>1</sub> Oui <sub>2</sub> Non

314.2. Le patient consommait-il de la truite d'élevage ? <sub>1</sub> Oui <sub>2</sub> Non

315. **Le patient consommait-il du poisson de mer frais (colin, merlan, sole, lotte, limande, mullet, bar, etc) ?**

- 1 Plusieurs fois par semaine
- 2 Au moins une fois par semaine
- 3 Au moins une fois par mois
- 4 Plus rarement
- 5 Jamais ➔ Allez directement à la question 316

315.1. **Le consommait-il parfois cru ?**  1 Oui  2 Non

315.2. **Le patient consommait-il du saumon frais ?**  1 Oui  2 Non

316. **Le patient consommait-il du poisson fumé (saumon, truite, anguille...) ?**  1 Oui  2 Non

317. **Le patient consommait-il du poisson en boîte (sardines, thon, maquereau...) ?**

- 1 Plusieurs fois par semaine
- 2 Au moins une fois par semaine
- 3 Au moins une fois par mois
- 4 Plus rarement
- 5 Jamais

318. **Le patient consommait-il des préparations de poisson type nuggets, poisson pané, surimi... ?**

- 1 Au moins une fois par semaine
- 2 Au moins une fois par mois
- 3 Plus rarement
- 4 Jamais

319. **Le patient consommait-il des coquillages (huîtres, moules, bigorneaux...) ?**

- 1 Au moins une fois par semaine
- 2 Au moins une fois par mois
- 3 Plus rarement
- 4 Jamais

320. **Le patient consommait-il des crustacés (crabe, crevettes, homard...) ?**

- 1 Au moins une fois par semaine
- 2 Au moins une fois par mois
- 3 Plus rarement
- 4 Jamais

### Légumes

321. **Le patient consommait-il des légumes venant d'une grande ou petite surface ?**  1 Oui  2 Non

322. **Le patient consommait-il des légumes venant d'une ferme d'un maraîcher ou de plantation familiale ?**

- 1 Oui
- 2 Non

323. **Le patient consommait-il des purées "toutes prêtes" à reconstituer (purée en flocons...) ?**

- 1 Plusieurs fois par semaine
- 2 Au moins une fois par semaine
- 3 Au moins une fois par mois
- 4 Plus rarement
- 5 Jamais



324. **Les légumes étaient-ils épluchés et préparés à la maison ?**

- 1 Plusieurs fois par semaine
- 2 Au moins une fois par semaine
- 3 Au moins une fois par mois
- 4 Plus rarement
- 5 Jamais

325. **Le patient consommait-il des champignons cultivés (champignons de Paris, pleurotes...) ?**

- 1 Oui
- 2 Non

326. **Le patient consommait-il des champignons sauvages ?**

- 1 Oui
- 2 Non

**Fruits**

**Le patient consommait :**

- |                                                                                                       | Oui                        | Non                        |
|-------------------------------------------------------------------------------------------------------|----------------------------|----------------------------|
| 327. <b>Des fruits venant d'une grande ou petite surface ?</b> .....                                  | <input type="checkbox"/> 1 | <input type="checkbox"/> 2 |
| 328. <b>Des fruits venant d'une ferme ou d'un verger familial ?</b> .....                             | <input type="checkbox"/> 1 | <input type="checkbox"/> 2 |
| 329. <b>Des bananes ?</b> .....                                                                       | <input type="checkbox"/> 1 | <input type="checkbox"/> 2 |
| 330. <b>Des litchis ou ananas, mangues, goyaves, papayes, fruits de la passion <u>frais</u>?</b> .... | <input type="checkbox"/> 1 | <input type="checkbox"/> 2 |
| 331. <b>D'autres fruits exotiques <u>frais</u> ?</b> .....                                            | <input type="checkbox"/> 1 | <input type="checkbox"/> 2 |

**Produits laitiers**

332. **Le patient mangeait-il du fromage ?**

- |                                       |                                       |                                |                                |
|---------------------------------------|---------------------------------------|--------------------------------|--------------------------------|
| 332.1. <input type="checkbox"/> 1 Oui | <b>Si oui, du fromage de chèvre ?</b> | <input type="checkbox"/> 1 Oui | <input type="checkbox"/> 2 Non |
| 332.2.                                | <b>du fromage de brebis ?</b>         | <input type="checkbox"/> 1 Oui | <input type="checkbox"/> 2 Non |
| 332.3.                                | <b>du fromage de vache ?</b>          | <input type="checkbox"/> 1 Oui | <input type="checkbox"/> 2 Non |
| <input type="checkbox"/> 2 Non        |                                       |                                |                                |

**Le patient consommait-il :**

- |                                                                   | Oui                        | Non                        |
|-------------------------------------------------------------------|----------------------------|----------------------------|
| 333. <b>Des laitages ou du fromage <u>au lait cru</u> ?</b> ..... | <input type="checkbox"/> 1 | <input type="checkbox"/> 2 |
| 334. <b>Habituellement les croûtes de fromage ?</b> .....         | <input type="checkbox"/> 1 | <input type="checkbox"/> 2 |
| 335. <b>Des oeufs frais ?</b> .....                               | <input type="checkbox"/> 1 | <input type="checkbox"/> 2 |

336. **Le patient consommait des yaourts ou des petits-suisseurs ?**

- 1 Plusieurs fois par jour
- 2 Au moins une fois par jour
- 3 Au moins une fois par semaine
- 3 Au moins une fois par mois
- 4 Plus rarement
- 5 Jamais

### Dessert

| Le patient consommait-il :                                                                              | Plusieurs fois<br>par jour     | Au moins<br>une fois par jour  | Au moins une fois<br>par semaine | Plus rarement              | Jamais                     |
|---------------------------------------------------------------------------------------------------------|--------------------------------|--------------------------------|----------------------------------|----------------------------|----------------------------|
| 337. Des gâteaux, biscuits .....                                                                        | <input type="checkbox"/> 1     | <input type="checkbox"/> 2     | <input type="checkbox"/> 3       | <input type="checkbox"/> 4 | <input type="checkbox"/> 5 |
| 338. Des confitures .....                                                                               | <input type="checkbox"/> 1     | <input type="checkbox"/> 2     | <input type="checkbox"/> 3       | <input type="checkbox"/> 4 | <input type="checkbox"/> 5 |
| 339. De la Marmite, de la Vegemite<br>ou du Cenovis.....                                                | <input type="checkbox"/> 1     | <input type="checkbox"/> 2     | <input type="checkbox"/> 3       | <input type="checkbox"/> 4 | <input type="checkbox"/> 5 |
| 340. Des confiseries du commerce<br>(bonbons, fraises artificielles, etc) ?                             | <input type="checkbox"/> 1     | <input type="checkbox"/> 2     | <input type="checkbox"/> 3       | <input type="checkbox"/> 4 | <input type="checkbox"/> 5 |
| 341. Du chocolat ? .....                                                                                | <input type="checkbox"/> 1     | <input type="checkbox"/> 2     | <input type="checkbox"/> 3       | <input type="checkbox"/> 4 | <input type="checkbox"/> 5 |
| 342. Des produits type Nutella ? .....                                                                  | <input type="checkbox"/> 1     | <input type="checkbox"/> 2     | <input type="checkbox"/> 3       | <input type="checkbox"/> 4 | <input type="checkbox"/> 5 |
| 343. Le patient consommait-il des cacahuètes ou des chips d'apéritif à la cacahuète de temps en temps ? |                                |                                |                                  |                            |                            |
|                                                                                                         | <input type="checkbox"/> 1 Oui | <input type="checkbox"/> 2 Non |                                  |                            |                            |

### Huiles

| Quels types d'huiles utilisait-on :          | Oui                        | Non                        |
|----------------------------------------------|----------------------------|----------------------------|
| 344. De l'huile de tournesol ? .....         | <input type="checkbox"/> 1 | <input type="checkbox"/> 2 |
| 345. De l'huile d'olive ? .....              | <input type="checkbox"/> 1 | <input type="checkbox"/> 2 |
| 346. De l'huile de colza ? .....             | <input type="checkbox"/> 1 | <input type="checkbox"/> 2 |
| 347. De l'huile d'arachide ? .....           | <input type="checkbox"/> 1 | <input type="checkbox"/> 2 |
| 348. Des huiles mélangées (Isio4...) ? ..... | <input type="checkbox"/> 1 | <input type="checkbox"/> 2 |
| 349. D'autres types d'huiles ? .....         | <input type="checkbox"/> 1 | <input type="checkbox"/> 2 |

### Boissons

| Le patient consommait-il :             | Plusieurs fois<br>par jour | Au moins<br>une fois par jour | Au moins une fois<br>par semaine | Plus rarement              | Jamais                     |
|----------------------------------------|----------------------------|-------------------------------|----------------------------------|----------------------------|----------------------------|
| 350. Des jus de fruits ? .....         | <input type="checkbox"/> 1 | <input type="checkbox"/> 2    | <input type="checkbox"/> 3       | <input type="checkbox"/> 4 | <input type="checkbox"/> 5 |
| 351. Du Coca-Cola ou du Pepsi ? .....  | <input type="checkbox"/> 1 | <input type="checkbox"/> 2    | <input type="checkbox"/> 3       | <input type="checkbox"/> 4 | <input type="checkbox"/> 5 |
| 352. Des sodas gazeux ? .....          | <input type="checkbox"/> 1 | <input type="checkbox"/> 2    | <input type="checkbox"/> 3       | <input type="checkbox"/> 4 | <input type="checkbox"/> 5 |
| 353. D'autres boissons sucrées ? ..... | <input type="checkbox"/> 1 | <input type="checkbox"/> 2    | <input type="checkbox"/> 3       | <input type="checkbox"/> 4 | <input type="checkbox"/> 5 |

### Modes de cuisson et de conservation

354. La cuisine familiale utilisait un four à micro-ondes pour cuire ou réchauffer les aliments ?
- 1 Tous les jours
  - 2 Au moins une fois par semaine
  - 3 Au moins une fois par mois
  - 4 Plus rarement
  - 5 Jamais

- Le patient consommait-il :** Oui Non
355. **Des viandes surgelées ?** ..... <sub>1</sub> <sub>2</sub>
356. **Des poissons surgelés ?** ..... <sub>1</sub> <sub>2</sub>
357. **Des légumes surgelés ?** ..... <sub>1</sub> <sub>2</sub>

358. **Y avait-il des congélations familiales ?** <sub>1</sub> Oui <sub>2</sub> Non ➡ *Allez directement à la question 359*

- Si oui, y avait-il des congélations familiales :** Oui Non
- 358.1. **De viande ?** ..... <sub>1</sub> <sub>2</sub>
- 358.2. **De poisson ?** ..... <sub>1</sub> <sub>2</sub>
- 358.3. **De légumes ?** ..... <sub>1</sub> <sub>2</sub>
- 358.4. **De gibier ?** ..... <sub>1</sub> <sub>2</sub>

- Le patient consommait-il :** Oui Non
359. **Des conserves familiales de légumes ?** ..... <sub>1</sub> <sub>2</sub>
360. **Des conserves de fruits ?** ..... <sub>1</sub> <sub>2</sub>
361. **Des conserves de produits animaux (pâté, couscous, cassoulet, thon...)?** ..... <sub>1</sub> <sub>2</sub>

## 5.2 - Habitat du patient avant la découverte du diabète

*Toutes les questions qui suivent concernent l'habitation dans laquelle le patient passait le plus de temps*

362. **Quelle était approximativement la surface de l'habitation ?**
- <sub>1</sub> moins de 40 m<sup>2</sup>
- <sub>2</sub> de 40 m<sup>2</sup> à moins de 70 m<sup>2</sup>
- <sub>3</sub> de 70 m<sup>2</sup> à moins de 100 m<sup>2</sup>
- <sub>4</sub> de 100 m<sup>2</sup> à moins de 150 m<sup>2</sup>
- <sub>5</sub> 150 m<sup>2</sup> ou plus
363. **Comment était chauffée cette habitation ?**
- <sub>1</sub> Chauffage individuel (différent pour chaque pièce)
- <sub>2</sub> Chauffage central
364. **Quel était le mode de chauffage (plusieurs réponses possibles) ?**
- <sub>1</sub> Chauffage électrique (convecteurs, radiateurs électriques...)
- <sub>2</sub> Chauffage au gaz
- <sub>3</sub> Chauffage au fioul
- <sub>4</sub> Cheminée
- <sub>5</sub> Autre

- | <b>Dans l'habitation, utilisait-on :</b> |                                                          | Oui                        | Non                        |
|------------------------------------------|----------------------------------------------------------|----------------------------|----------------------------|
| 365.                                     | <b>Des produits contre les souris, rats ?</b> .....      | <input type="checkbox"/> 1 | <input type="checkbox"/> 2 |
| 366.                                     | <b>Des produits contre les fourmis ?</b> .....           | <input type="checkbox"/> 1 | <input type="checkbox"/> 2 |
| 367.                                     | <b>Des produits contre les cafards ?</b> .....           | <input type="checkbox"/> 1 | <input type="checkbox"/> 2 |
| 368.                                     | <b>Des produits (plaquettes...) anti-mouches ?</b> ..... | <input type="checkbox"/> 1 | <input type="checkbox"/> 2 |
| 369.                                     | <b>Des produits anti-moustiques (prise...) ?</b> .....   | <input type="checkbox"/> 1 | <input type="checkbox"/> 2 |
| 370.                                     | <b>Des produits antimites ?</b> .....                    | <input type="checkbox"/> 1 | <input type="checkbox"/> 2 |

371. **De quel type d'habitation s'agissait-il ?**

1 Une maison

371.1. **Dans ce cas à quel étage se situait la chambre du patient ?**

- 1 Au rez-de-chaussée  
 2 Au 1er, 2e, 3e ou 4e étage  
 3 Plus haut

371.2. **L'évacuation des eaux usées se faisait-elle ?**

- 1 Dans une fosse septique  
 2 Dans le tout-à-l'égout

2 Un appartement

371.3. **Dans ce cas à quel étage se situait l'appartement ?**

- 1 Au rez-de-chaussée  
 2 Au 1er, 2e, 3e ou 4e étage  
 3 Au 5e, 6e, 7e ou 8e étage  
 4 Au 9e étage ou plus haut

3 Une caravane

372. **Y avait-il un jardin ou un terrain autour de l'habitation ?**

- 1 Oui  
 2 Non ➡ *Allez directement à la question 373 page 36*

| <b>Dans le jardin :</b> |  | Oui | Non |
|-------------------------|--|-----|-----|
|-------------------------|--|-----|-----|

- |        |                                                            |                            |                            |
|--------|------------------------------------------------------------|----------------------------|----------------------------|
| 372.1. | <b>Y avait-il des fleurs ?</b> .....                       | <input type="checkbox"/> 1 | <input type="checkbox"/> 2 |
| 372.2. | <b>Y avait-il des légumes ?</b> .....                      | <input type="checkbox"/> 1 | <input type="checkbox"/> 2 |
| 372.3. | <b>Y avait-il des arbres fruitiers, des fruits ?</b> ..... | <input type="checkbox"/> 1 | <input type="checkbox"/> 2 |

372.4. **Le patient jouait-il dans ce jardin ou ce terrain ?**

- 1 Tous les jours  
 2 Au moins une fois par semaine  
 3 Au moins une fois par mois  
 4 Plus rarement  
 5 Jamais

- | Utilisait-on dans le jardin :                                                                | Oui                            | Non                            |
|----------------------------------------------------------------------------------------------|--------------------------------|--------------------------------|
| 372.5. Des engrais (naturels ou chimiques) ? .....                                           | <input type="checkbox"/> 1     | <input type="checkbox"/> 2     |
| 372.6. Des insecticides (pour lutter contre les insectes) ? .....                            | <input type="checkbox"/> 1     | <input type="checkbox"/> 2     |
| 372.7. Des fongicides (pour lutter contre les champignons) ? .....                           | <input type="checkbox"/> 1     | <input type="checkbox"/> 2     |
| 372.8. Des désherbants (pour lutter contre les mauvaises herbes) ? .....                     | <input type="checkbox"/> 1     | <input type="checkbox"/> 2     |
| 372.9. Des produits pour lutter contre les escargots et limaces ? .....                      | <input type="checkbox"/> 1     | <input type="checkbox"/> 2     |
| 372.10. Des produits contre les fourmis ? .....                                              | <input type="checkbox"/> 1     | <input type="checkbox"/> 2     |
| 372.11. Des produits pour lutter contre des animaux nuisibles :<br>taupes, souris... ? ..... | <input type="checkbox"/> 1     | <input type="checkbox"/> 2     |
| 372.12. Y avait-il une piscine dans le jardin ?                                              | <input type="checkbox"/> 1 Oui | <input type="checkbox"/> 2 Non |

### La chambre du patient

373. Le patient avait-il une chambre pour lui seul ?
- 1 Oui
- 373.1.  2 Non Si non, partageait-il une chambre avec ses frères ou sœurs ?  1 Oui  2 Non
- 373.2.  1 Oui  2 Non partageait-il une chambre avec ses parents ?  1 Oui  2 Non
374. Le sol de la chambre du patient était en :
- 1 Moquette
- 2 Carrelage
- 3 Parquet
- 4 Autre
375. La literie (oreillers ou couettes) du patient était-elle en plumes naturelles ?  1 Oui  2 Non
- | Utilisait-on dans la chambre du patient :              | Oui                        | Non                        |
|--------------------------------------------------------|----------------------------|----------------------------|
| 376. Des produits contre les fourmis ? .....           | <input type="checkbox"/> 1 | <input type="checkbox"/> 2 |
| 377. Des produits (plaquettes...) anti-mouches ? ..... | <input type="checkbox"/> 1 | <input type="checkbox"/> 2 |
| 378. Des produits anti-moustiques (prise...) ? .....   | <input type="checkbox"/> 1 | <input type="checkbox"/> 2 |
| 379. Des produits antimites ? .....                    | <input type="checkbox"/> 1 | <input type="checkbox"/> 2 |
| 380. Des produits contre les souris, rats ? .....      | <input type="checkbox"/> 1 | <input type="checkbox"/> 2 |
381. La chambre du patient avait une/des fenêtre(s) sur (plusieurs réponses possibles) :
- 1 Rue
- 2 Jardin
- 3 Cour intérieure
382. L'exposition principale de la fenêtre de la chambre était :
- 1 Ouest
- 2 Est
- 3 Sud
- 4 Nord
383. De la fenêtre de la chambre voyait-on des arbres ?  1 Oui  2 Non
384. De la fenêtre de la chambre voyait-on des champs ?  1 Oui  2 Non

### Le reste de l'habitation

- Dans la maison :**
- |                                                                                        | Oui                            | Non                            |
|----------------------------------------------------------------------------------------|--------------------------------|--------------------------------|
| 385. La salle de bain du patient était-elle séparée de celle des parents ? .....       | <input type="checkbox"/> 1     | <input type="checkbox"/> 2     |
| 386. Les toilettes WC du patient étaient-elles séparées de celles des parents ? .....  | <input type="checkbox"/> 1     | <input type="checkbox"/> 2     |
| 387. Les toilettes WC étaient-elles dans la salle de bain du patient ? .....           | <input type="checkbox"/> 1     | <input type="checkbox"/> 2     |
| 388. Utilisait-on une machine à laver la vaisselle pour la vaisselle familiale ? ..... | <input type="checkbox"/> 1     | <input type="checkbox"/> 2     |
| 389. Utilisait-on un aspirateur ? .....                                                | <input type="checkbox"/> 1     | <input type="checkbox"/> 2     |
| 390. Y avait-il eu des travaux de peinture dans la maison ou l'appartement ? .....     | <input type="checkbox"/> 1     | <input type="checkbox"/> 2     |
| 391. Y avait-il eu d'autres travaux ? .....                                            | <input type="checkbox"/> 1     | <input type="checkbox"/> 2     |
| 392. Avec quelle fréquence le réfrigérateur était-il nettoyé à fond ?                  |                                |                                |
| <input type="checkbox"/> 1 Au moins une fois par semaine                               |                                |                                |
| <input type="checkbox"/> 2 Au moins une fois par mois                                  |                                |                                |
| <input type="checkbox"/> 3 Au moins une fois par trimestre                             |                                |                                |
| <input type="checkbox"/> 4 Au moins une fois par an                                    |                                |                                |
| <input type="checkbox"/> 5 Moins souvent                                               |                                |                                |
| 393. Y avait-il des plantes en pots à la maison ou sur un balcon ?                     | <input type="checkbox"/> 1 Oui | <input type="checkbox"/> 2 Non |
| 394. Y avait-il des fleurs dans des vases avec de l'eau ?                              | <input type="checkbox"/> 1 Oui | <input type="checkbox"/> 2 Non |

### Autour de l'habitation

395. De l'habitation, voyait-on des arbres ?       1 Oui       2 Non
396. De l'habitation, voyait-on des champs ?       1 Oui       2 Non
397. A proximité de l'habitation, y avait-il des terres agricoles ?
- 1 Oui       2 Non ➔ Allez à la question 398

**Si oui, y avait-il des cultures :**

- |                             | Oui                        | Non                        | Ne sait pas                |
|-----------------------------|----------------------------|----------------------------|----------------------------|
| 397.1. De blé ? .....       | <input type="checkbox"/> 1 | <input type="checkbox"/> 2 | <input type="checkbox"/> 3 |
| 397.2. De maïs ? .....      | <input type="checkbox"/> 1 | <input type="checkbox"/> 2 | <input type="checkbox"/> 3 |
| 397.3. De vigne ? .....     | <input type="checkbox"/> 1 | <input type="checkbox"/> 2 | <input type="checkbox"/> 3 |
| 397.4. De colza ? .....     | <input type="checkbox"/> 1 | <input type="checkbox"/> 2 | <input type="checkbox"/> 3 |
| 397.5. De tournesol ? ..... | <input type="checkbox"/> 1 | <input type="checkbox"/> 2 | <input type="checkbox"/> 3 |
| 397.6. De légumes ? .....   | <input type="checkbox"/> 1 | <input type="checkbox"/> 2 | <input type="checkbox"/> 3 |

**A proximité de l'habitation, y avait-il :**

- |                                               | Oui                        | Non                        |
|-----------------------------------------------|----------------------------|----------------------------|
| 398. Un élevage intensif de volailles ? ..... | <input type="checkbox"/> 1 | <input type="checkbox"/> 2 |
| 399. Un élevage intensif de porcs ? .....     | <input type="checkbox"/> 1 | <input type="checkbox"/> 2 |
| 400. Une usine ? .....                        | <input type="checkbox"/> 1 | <input type="checkbox"/> 2 |

### 5.3 - Le patient est gardé avant la découverte du diabète

401. **Le patient avant trois ans était-il gardé ?**  1 Oui  2 Non ➡ Allez à la question 402 page 40

*Sans toutefois vous livrer à une enquête trop poussée, pouvez-vous porter une attention particulière aux questions suivantes ?*

- Un enfant ou une personne gardant le patient, futur diabétique a-t-il eu :** Oui Non
- 401.1. **La rougeole ?** .....  1  2
- 401.2. **Les oreillons ?** .....  1  2
- 401.3. **La varicelle ?** .....  1  2
- 401.4. **Un syndrome pied main bouche (éruption des paumes et des plantes et bulles dans la bouche) ?** .....  1  2
- 401.5. **La grippe ?** .....  1  2
- 401.6. **Une infection respiratoire ou une bronchiolite ?** .....  1  2
- 401.7. **Une diarrhée aiguë avec des vomissements ?** .....  1  2
- 401.8. **Une hépatite ?** .....  1  2
- 401.9. **Des épisodes fébriles répétés ?** .....  1  2
- 401.10. **Une méningite virale ?** .....  1  2

.....

401.11. **Avant trois ans (et avant le diagnostic du diabète), le patient était-il gardé en crèche ?**  
 1 Oui  2 Non ➡ Allez à la question 401.12

- Si oui, allait-il à la crèche** Oui Non
- 401.11.1. **Entre 3 et 6 mois ?** .....  1  2
- 401.11.2. **Entre 6 mois et un an ?** .....  1  2
- 401.11.3. **Entre 1 an et 2 ans ?** .....  1  2
- 401.11.4. **Entre 2 ans et 3 ans ?** .....  1  2
- 401.11.5. **Allait-il en crèche collective ?** .....  1  2
- 401.11.6. **Allait-il en crèche familiale ?** .....  1  2
- 401.11.7. **Allait-il en garde partagée ?** .....  1  2

401.12. **Avant trois ans, le patient était-il gardé chez une nourrice ?**  
 1 Oui  2 Non ➡ Allez à la question 402 page 40

401.12.1. **Y avait-il d'autres enfants chez cette nourrice ?**  1 Oui  2 Non

- 401.12.2. **Quelle était approximativement la surface de l'habitation de la nourrice ?**
- 1 moins de 40 m<sup>2</sup>
- 2 de 40 m<sup>2</sup> à moins de 70 m<sup>2</sup>
- 3 de 70 m<sup>2</sup> à moins de 100 m<sup>2</sup>
- 4 de 100 m<sup>2</sup> à moins de 150 m<sup>2</sup>
- 5 150 m<sup>2</sup> ou plus

401.12.3. **Le patient avait-il une chambre pour lui tout seul ?**  1 Oui  2 Non

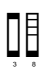

401.12.4. **Le sol de la chambre du patient était en :**

- 1 Moquette
- 2 Carrelage
- 3 Parquet
- 4 Autre

401.12.5. **La chambre du patient avait une fenêtre sur :**

- 1 Rue
- 2 Jardin
- 3 Cour intérieure

401.12.6. **Voyait-on des arbres de l'habitation ou de la fenêtre de la chambre ?**

- 1 Oui
- 2 Non

401.12.7. **Voyait-on des champs de l'habitation ou de la fenêtre de la chambre ?**

- 1 Oui
- 2 Non

401.12.8. **Dans quel type d'habitation la nourrice recevait-elle les enfants ?**

401.12.8.1.  1 Une maison : **Dans ce cas, à quel étage était la chambre du patient ?**

- 1 Au rez-de-chaussée
- 2 Au 1er, 2e, 3e ou 4e étage
- 3 Plus haut

401.12.8.2.  1 Un appartement : **Dans ce cas, à quel étage se situait l'appartement ?**

- 1 Au rez-de-chaussée
- 2 Au 1er, 2e, 3e ou 4e étage
- 3 Au 5e, 6e, 7e ou 8e étage
- 4 Au 9e étage ou plus haut

401.12.9. **Y avait-il un jardin ou un terrain autour de l'habitation de la nourrice ?**

- 1 Oui
- 2 Non ➔ Allez à la question 402 page 40

**Dans le jardin ou le terrain :**

- |                                                   | Oui                        | Non                        |
|---------------------------------------------------|----------------------------|----------------------------|
| 401.12.9.1. <b>Y avait-il des fleurs ?</b> .....  | <input type="checkbox"/> 1 | <input type="checkbox"/> 2 |
| 401.12.9.2. <b>Y avait-il des légumes ?</b> ..... | <input type="checkbox"/> 1 | <input type="checkbox"/> 2 |
| 401.12.9.3. <b>Y avait-il des fruits ?</b> .....  | <input type="checkbox"/> 1 | <input type="checkbox"/> 2 |

401.12.9.4. **Le patient jouait-il dans ce jardin ou terrain ?**

- 1 Tous les jours
- 2 Au moins une fois par semaine
- 3 Au moins une fois par mois
- 4 Plus rarement
- 4 Jamais

401.12.9.5. **Y avait-il une piscine dans le jardin ?**  1 Oui  2 Non



## 5.4 - Les déplacements, loisirs du patient avant la découverte du diabète

402. Le futur diabétique allait-il au jardin public, au square étant petit ?

402.1. <sub>1</sub> Oui Si oui, jouait-il dans un bac à sable dans ce jardin public ou ce square ?

<sub>1</sub> Oui <sub>2</sub> Non

<sub>2</sub> Non

### Ecole

Le patient a-t-il été :

403. A l'école maternelle avant le diabète ? <sub>1</sub> Oui <sub>2</sub> Non

404. A l'école primaire avant le diabète ? <sub>1</sub> Oui <sub>2</sub> Non

Si le patient allait à l'école ou à la crèche avant le diabète, comment se déplaçait-il (plusieurs réponses possibles) :

|                                   | Oui                                   | Non                                   |
|-----------------------------------|---------------------------------------|---------------------------------------|
| 405. A pied ? .....               | <input type="checkbox"/> <sub>1</sub> | <input type="checkbox"/> <sub>2</sub> |
| 406. En voiture familiale ? ..... | <input type="checkbox"/> <sub>1</sub> | <input type="checkbox"/> <sub>2</sub> |
| 407. En bus scolaire ? .....      | <input type="checkbox"/> <sub>1</sub> | <input type="checkbox"/> <sub>2</sub> |
| 408. En métro ? .....             | <input type="checkbox"/> <sub>1</sub> | <input type="checkbox"/> <sub>2</sub> |
| 409. En autobus ? .....           | <input type="checkbox"/> <sub>1</sub> | <input type="checkbox"/> <sub>2</sub> |
| 410. En vélo ? .....              | <input type="checkbox"/> <sub>1</sub> | <input type="checkbox"/> <sub>2</sub> |
| 411. En moto, scooter ? .....     | <input type="checkbox"/> <sub>1</sub> | <input type="checkbox"/> <sub>2</sub> |
| 412. Autre ? .....                | <input type="checkbox"/> <sub>1</sub> | <input type="checkbox"/> <sub>2</sub> |

Par ailleurs, le futur diabétique était-il transporté ou se déplaçait-il :

|                                              | Au moins une fois<br>par semaine          | Au moins une fois<br>par mois             | Plus rarement                         | Jamais                                |
|----------------------------------------------|-------------------------------------------|-------------------------------------------|---------------------------------------|---------------------------------------|
| 413. En métro ? .....                        | <input type="checkbox"/> <sub>1</sub>     | <input type="checkbox"/> <sub>2</sub>     | <input type="checkbox"/> <sub>3</sub> | <input type="checkbox"/> <sub>4</sub> |
| 414. En bus ? .....                          | <input type="checkbox"/> <sub>1</sub>     | <input type="checkbox"/> <sub>2</sub>     | <input type="checkbox"/> <sub>3</sub> | <input type="checkbox"/> <sub>4</sub> |
| 415. Avait-il pris plusieurs fois le train ? | <input type="checkbox"/> <sub>1</sub> Oui | <input type="checkbox"/> <sub>2</sub> Non |                                       |                                       |
| 416. Avait-il pris l'avion ?                 | <input type="checkbox"/> <sub>1</sub> Oui | <input type="checkbox"/> <sub>2</sub> Non |                                       |                                       |

417. Le futur diabétique s'est-il rendu à l'étranger ?

<sub>1</sub> Oui <sub>2</sub> Non ➡ Allez à la question 418

Si oui, dans quelle région :

|                                                     | Oui                                   | Non                                   |
|-----------------------------------------------------|---------------------------------------|---------------------------------------|
| 417.1. Europe ? .....                               | <input type="checkbox"/> <sub>1</sub> | <input type="checkbox"/> <sub>2</sub> |
| 417.2. Afrique du nord ? .....                      | <input type="checkbox"/> <sub>1</sub> | <input type="checkbox"/> <sub>2</sub> |
| 417.3. Reste de l'Afrique ? .....                   | <input type="checkbox"/> <sub>1</sub> | <input type="checkbox"/> <sub>2</sub> |
| 417.4. Amérique du nord ? .....                     | <input type="checkbox"/> <sub>1</sub> | <input type="checkbox"/> <sub>2</sub> |
| 417.5. Amérique centrale ou Amérique du sud ? ..... | <input type="checkbox"/> <sub>1</sub> | <input type="checkbox"/> <sub>2</sub> |
| 417.6. Asie ? .....                                 | <input type="checkbox"/> <sub>1</sub> | <input type="checkbox"/> <sub>2</sub> |
| 417.7. Océanie ? .....                              | <input type="checkbox"/> <sub>1</sub> | <input type="checkbox"/> <sub>2</sub> |

418. Avant le diabète, le patient était-il allé aux sports d'hiver ? <sub>1</sub> Oui <sub>2</sub> Non

419. Avant le diabète, le patient était-il allé au bord de la mer ?

- 1 Oui       2 Non ➡ Allez à la question 420

419.1. Si oui, combien a-t-il fait de séjours à la mer entre sa naissance et le diagnostic du diabète ?

- 1 Un séjour  
 1 Entre un et cinq séjours  
 1 Plus de cinq séjours

Le patient :

- |                                                     | Oui                        | Non                        |
|-----------------------------------------------------|----------------------------|----------------------------|
| 419.2. Allait-il au bord de l'Atlantique ? .....    | <input type="checkbox"/> 1 | <input type="checkbox"/> 2 |
| 419.3. Allait-il au bord de la Méditerranée ? ..... | <input type="checkbox"/> 1 | <input type="checkbox"/> 2 |
| 419.4. Allait-il au bord d'une autre mer ? .....    | <input type="checkbox"/> 1 | <input type="checkbox"/> 2 |
| 419.5. Allait-il sur la plage ? .....               | <input type="checkbox"/> 1 | <input type="checkbox"/> 2 |
| 419.6. Se baignait-il dans la mer ? .....           | <input type="checkbox"/> 1 | <input type="checkbox"/> 2 |

Le patient :

- |                                                                                                              | Oui                        | Non                        |
|--------------------------------------------------------------------------------------------------------------|----------------------------|----------------------------|
| 420. Allait-il à la piscine municipale ? .....                                                               | <input type="checkbox"/> 1 | <input type="checkbox"/> 2 |
| 421. À la piscine chez des amis ? .....                                                                      | <input type="checkbox"/> 1 | <input type="checkbox"/> 2 |
| 422. Faisait-il régulièrement du poney ? .....                                                               | <input type="checkbox"/> 1 | <input type="checkbox"/> 2 |
| 423. Participait-il régulièrement aux activités d'un club avec d'autres enfants (sports, musique...) ? ..... | <input type="checkbox"/> 1 | <input type="checkbox"/> 2 |
| 424. Jouait-il le week-end avec d'autres enfants ? .....                                                     | <input type="checkbox"/> 1 | <input type="checkbox"/> 2 |
| 425. Était-il plutôt solitaire ? .....                                                                       | <input type="checkbox"/> 1 | <input type="checkbox"/> 2 |

426. Le patient était-il exposé au soleil ?

- 1 Tous les jours  
 2 Au moins une fois par semaine  
 3 Au moins une fois par mois  
 4 Plus rarement  
 5 Pendant les vacances seulement  
 6 Jamais ou presque jamais

Le patient faisait-il des promenades : Au moins une fois par jour      Au moins une fois par semaine      Au moins une fois par mois      Plus rarement      Jamais

- |                                   |                            |                            |                            |                            |                            |
|-----------------------------------|----------------------------|----------------------------|----------------------------|----------------------------|----------------------------|
| 427. En ville ? .....             | <input type="checkbox"/> 1 | <input type="checkbox"/> 2 | <input type="checkbox"/> 3 | <input type="checkbox"/> 4 | <input type="checkbox"/> 5 |
| 428. Au centre commercial ? ..... | <input type="checkbox"/> 1 | <input type="checkbox"/> 2 | <input type="checkbox"/> 3 | <input type="checkbox"/> 4 | <input type="checkbox"/> 5 |
| 429. En forêt ? .....             | <input type="checkbox"/> 1 | <input type="checkbox"/> 2 | <input type="checkbox"/> 3 | <input type="checkbox"/> 4 | <input type="checkbox"/> 5 |
| 430. Dans la campagne ? .....     | <input type="checkbox"/> 1 | <input type="checkbox"/> 2 | <input type="checkbox"/> 3 | <input type="checkbox"/> 4 | <input type="checkbox"/> 5 |
| 431. En montagne ? .....          | <input type="checkbox"/> 1 | <input type="checkbox"/> 2 | <input type="checkbox"/> 3 | <input type="checkbox"/> 4 | <input type="checkbox"/> 5 |

432. Le patient faisait-il des promenades au bord de rivières ?

- 1 Au moins une fois par semaine  
 2 Au moins une fois par mois  
 3 Plus rarement  
 4 Jamais ➡ Allez à la question 433

➡ Si vous avez coché une de ces cases, allez à la question 432.1

432.1. Le patient se baignait-il ou jouait-il dedans ?  1 Oui       2 Non

433. Le patient faisait-il des promenades au bord d'étangs, de lacs ou de mares ?

- 433.1.  1 Oui      Si oui, se baignait-il ou jouait-il dedans ?  1 Oui       2 Non  
 2 Non

## 5.5 - Animaux des environs avant la découverte du diabète

434. Le patient avait été au zoo ?

- <sub>1</sub> Jamais  
<sub>2</sub> Une fois  
<sub>3</sub> Plusieurs fois

435. Le patient avait-il été dans un magasin d'animaux (poissons, reptiles, oiseaux) ?

- <sub>1</sub> Jamais  
<sub>2</sub> Une fois  
<sub>3</sub> Plusieurs fois

### Animaux domestiques

436. Au domicile familial, chez la nourrice ou dans un lieu fréquenté souvent par le patient (grands-parents, voisins, amis), y avait-il un ou des chiens ?

- <sub>1</sub> Oui      <sub>2</sub> Non      ➡ Allez à la question 437

436.1. Si oui, combien ?      <sub>1</sub> Un chien      <sub>2</sub> Plus d'un chien

De quelle race ?

|                               | Oui                                   | Non                                   |
|-------------------------------|---------------------------------------|---------------------------------------|
| 436.2. «Bâtard» ?.....        | <input type="checkbox"/> <sub>1</sub> | <input type="checkbox"/> <sub>2</sub> |
| 436.3. Labrador ? .....       | <input type="checkbox"/> <sub>1</sub> | <input type="checkbox"/> <sub>2</sub> |
| 436.4. Caniche ? .....        | <input type="checkbox"/> <sub>1</sub> | <input type="checkbox"/> <sub>2</sub> |
| 436.5. Yorkshire ?.....       | <input type="checkbox"/> <sub>1</sub> | <input type="checkbox"/> <sub>2</sub> |
| 436.6. Berger allemand ?..... | <input type="checkbox"/> <sub>1</sub> | <input type="checkbox"/> <sub>2</sub> |
| 436.7. Epagneul breton ?..... | <input type="checkbox"/> <sub>1</sub> | <input type="checkbox"/> <sub>2</sub> |
| 436.8. Autre Berger ? .....   | <input type="checkbox"/> <sub>1</sub> | <input type="checkbox"/> <sub>2</sub> |
| 436.9. Bichon ?.....          | <input type="checkbox"/> <sub>1</sub> | <input type="checkbox"/> <sub>2</sub> |
| 436.10. Cocker ?.....         | <input type="checkbox"/> <sub>1</sub> | <input type="checkbox"/> <sub>2</sub> |
| 436.11. Fox-Terrier ? .....   | <input type="checkbox"/> <sub>1</sub> | <input type="checkbox"/> <sub>2</sub> |
| 436.12. Boxer/Shih-tzu ?..... | <input type="checkbox"/> <sub>1</sub> | <input type="checkbox"/> <sub>2</sub> |
| 436.13. Autre ?.....          | <input type="checkbox"/> <sub>1</sub> | <input type="checkbox"/> <sub>2</sub> |

436.14. Y avait-il eu des naissances de chiots ?      <sub>1</sub> Oui      <sub>2</sub> Non

437. Au domicile familial, chez la nourrice ou dans un lieu fréquenté souvent par le patient (grands-parents, voisins, amis), y avait-il des chats ?

- <sub>1</sub> Oui      <sub>2</sub> Non      ➡ Allez à la question 438 page 43

437.1. Si oui, combien ?      <sub>1</sub> Un chat      <sub>2</sub> Plus d'un chat

de quelle race ?

|                                              | Oui                                   | Non                                   |
|----------------------------------------------|---------------------------------------|---------------------------------------|
| 437.2. Européen (chats de gouttières) ?..... | <input type="checkbox"/> <sub>1</sub> | <input type="checkbox"/> <sub>2</sub> |
| 437.3. Siamois ? .....                       | <input type="checkbox"/> <sub>1</sub> | <input type="checkbox"/> <sub>2</sub> |
| 437.4. Persan ? .....                        | <input type="checkbox"/> <sub>1</sub> | <input type="checkbox"/> <sub>2</sub> |
| 437.5. Chartreux ?.....                      | <input type="checkbox"/> <sub>1</sub> | <input type="checkbox"/> <sub>2</sub> |
| 437.6. Abyssin/Somali ? .....                | <input type="checkbox"/> <sub>1</sub> | <input type="checkbox"/> <sub>2</sub> |
| 437.7. Autres ?.....                         | <input type="checkbox"/> <sub>1</sub> | <input type="checkbox"/> <sub>2</sub> |

437.8. Y avait-il eu des naissances de chatons ?      <sub>1</sub> Oui      <sub>2</sub> Non

**Au domicile familial, chez la nourrice ou dans un lieu fréquenté souvent par le patient (grands-parents, voisins, amis), y avait-il :**

- |                                                                            | Oui                        | Non                        |
|----------------------------------------------------------------------------|----------------------------|----------------------------|
| 438. Un petit rongeur (hamster, cochon d'inde...) ? .....                  | <input type="checkbox"/> 1 | <input type="checkbox"/> 2 |
| 439. Un lapin ? .....                                                      | <input type="checkbox"/> 1 | <input type="checkbox"/> 2 |
| 440. Un furet ? .....                                                      | <input type="checkbox"/> 1 | <input type="checkbox"/> 2 |
| 441. Des poissons d'aquarium d'eau douce ? .....                           | <input type="checkbox"/> 1 | <input type="checkbox"/> 2 |
| 442. Des poissons d'aquarium d'eau de mer ? .....                          | <input type="checkbox"/> 1 | <input type="checkbox"/> 2 |
| 443. Des poissons rouges dans un bassin accessible au patient ? .....      | <input type="checkbox"/> 1 | <input type="checkbox"/> 2 |
| 444. Une tortue d'eau ? .....                                              | <input type="checkbox"/> 1 | <input type="checkbox"/> 2 |
| 445. Une tortue terrestre ? .....                                          | <input type="checkbox"/> 1 | <input type="checkbox"/> 2 |
| 446. Une poule ? .....                                                     | <input type="checkbox"/> 1 | <input type="checkbox"/> 2 |
| 447. D'autres volailles de basse-cour (canards, oies, pintades...) ? ..... | <input type="checkbox"/> 1 | <input type="checkbox"/> 2 |
| 448. Une vache ? .....                                                     | <input type="checkbox"/> 1 | <input type="checkbox"/> 2 |
| 449. Des moutons, chèvres ? .....                                          | <input type="checkbox"/> 1 | <input type="checkbox"/> 2 |
| 450. Un cochon ? .....                                                     | <input type="checkbox"/> 1 | <input type="checkbox"/> 2 |
| 451. Un cheval ou un poney ? .....                                         | <input type="checkbox"/> 1 | <input type="checkbox"/> 2 |
| 452. Plusieurs chevaux ou poneys ? .....                                   | <input type="checkbox"/> 1 | <input type="checkbox"/> 2 |
453. **Au domicile familial, chez la nourrice ou dans un lieu fréquenté souvent par le patient (grands-parents, voisins, amis), y avait-il des oiseaux en cage ?**  
 1 Oui       2 Non

454. **Au domicile familial, chez la nourrice ou dans un lieu fréquenté souvent par le patient (grands-parents, voisins, amis), y avait-il un autre animal familier au patient ?**  
 1 Oui       2 Non

### La santé des animaux domestiques

455. **Un des animaux familiers du patient était-il tombé malade pendant la période considérée ?**  
 1 Oui       2 Non ➡ Allez à la question 456 page 44

**Si oui, quel animal (plusieurs réponses possibles) :**

- |                                  | Oui                        | Non                        |
|----------------------------------|----------------------------|----------------------------|
| 455.1. Un chat ? .....           | <input type="checkbox"/> 1 | <input type="checkbox"/> 2 |
| 455.2. Un chien ? .....          | <input type="checkbox"/> 1 | <input type="checkbox"/> 2 |
| 455.3. Un rongeur, lapin ? ..... | <input type="checkbox"/> 1 | <input type="checkbox"/> 2 |
| 455.4. Un poisson ? .....        | <input type="checkbox"/> 1 | <input type="checkbox"/> 2 |
| 455.5. Un oiseau ? .....         | <input type="checkbox"/> 1 | <input type="checkbox"/> 2 |
| 455.6. Un autre animal ? .....   | <input type="checkbox"/> 1 | <input type="checkbox"/> 2 |

**Quelle était la cause de la maladie (plusieurs réponses possibles) :**

- |                                 | Oui                        | Non                        |
|---------------------------------|----------------------------|----------------------------|
| 455.7. Une infection ? .....    | <input type="checkbox"/> 1 | <input type="checkbox"/> 2 |
| 455.8. Une paralysie ? .....    | <input type="checkbox"/> 1 | <input type="checkbox"/> 2 |
| 455.9. Un diabète ? .....       | <input type="checkbox"/> 1 | <input type="checkbox"/> 2 |
| 455.10. Un accident ? .....     | <input type="checkbox"/> 1 | <input type="checkbox"/> 2 |
| 455.11. Inconnue ? .....        | <input type="checkbox"/> 1 | <input type="checkbox"/> 2 |
| 455.12. Une autre cause ? ..... | <input type="checkbox"/> 1 | <input type="checkbox"/> 2 |

456. Un des animaux familiers du patient était-il mort avant le diagnostic du diabète ?

1 Oui     2 Non ➔ Allez à la question 457

Si oui, quel animal (plusieurs réponses possibles) :

|                                  | Oui                        | Non                        |
|----------------------------------|----------------------------|----------------------------|
| 456.1. Un chat ? .....           | <input type="checkbox"/> 1 | <input type="checkbox"/> 2 |
| 456.2. Un chien ? .....          | <input type="checkbox"/> 1 | <input type="checkbox"/> 2 |
| 456.3. Un rongeur, lapin ? ..... | <input type="checkbox"/> 1 | <input type="checkbox"/> 2 |
| 456.4. Un poisson ? .....        | <input type="checkbox"/> 1 | <input type="checkbox"/> 2 |
| 456.5. Un oiseau ? .....         | <input type="checkbox"/> 1 | <input type="checkbox"/> 2 |
| 456.6. Un autre animal ? .....   | <input type="checkbox"/> 1 | <input type="checkbox"/> 2 |

Quelle était la cause de la mort (plusieurs réponses possibles) :

|                                 | Oui                        | Non                        |
|---------------------------------|----------------------------|----------------------------|
| 456.7. Une infection ? .....    | <input type="checkbox"/> 1 | <input type="checkbox"/> 2 |
| 456.8. Une paralysie ? .....    | <input type="checkbox"/> 1 | <input type="checkbox"/> 2 |
| 456.9. Un diabète ? .....       | <input type="checkbox"/> 1 | <input type="checkbox"/> 2 |
| 456.10. Un accident ? .....     | <input type="checkbox"/> 1 | <input type="checkbox"/> 2 |
| 456.11. La vieillesse ? .....   | <input type="checkbox"/> 1 | <input type="checkbox"/> 2 |
| 456.12. Inconnue ? .....        | <input type="checkbox"/> 1 | <input type="checkbox"/> 2 |
| 456.13. Une autre cause ? ..... | <input type="checkbox"/> 1 | <input type="checkbox"/> 2 |

Les animaux du voisinage

Pensez aux animaux présents dans le proche voisinage (à moins de 100 mètres) :  
vaches, moutons, porcs, chevaux, etc

En dehors de son domicile (voisin, école, promenades), le patient avait-il eu une possibilité de contact direct avec :

|                                                                            | Oui<br>assez souvent       | Non<br>exceptionnellement  |
|----------------------------------------------------------------------------|----------------------------|----------------------------|
| 457. Un chien ? .....                                                      | <input type="checkbox"/> 1 | <input type="checkbox"/> 2 |
| 458. Un chat ? .....                                                       | <input type="checkbox"/> 1 | <input type="checkbox"/> 2 |
| 459. Un petit rongeur (hamster, cochon d'inde...) ? .....                  | <input type="checkbox"/> 1 | <input type="checkbox"/> 2 |
| 460. Un lapin ? .....                                                      | <input type="checkbox"/> 1 | <input type="checkbox"/> 2 |
| 461. Un furet ? .....                                                      | <input type="checkbox"/> 1 | <input type="checkbox"/> 2 |
| 462. Des poissons d'aquarium d'eau douce ? .....                           | <input type="checkbox"/> 1 | <input type="checkbox"/> 2 |
| 463. Des poissons d'aquarium d'eau de mer ? .....                          | <input type="checkbox"/> 1 | <input type="checkbox"/> 2 |
| 464. Des poissons rouges dans un bassin accessible au patient ? .....      | <input type="checkbox"/> 1 | <input type="checkbox"/> 2 |
| 465. Une tortue d'eau ? .....                                              | <input type="checkbox"/> 1 | <input type="checkbox"/> 2 |
| 466. Une tortue terrestre ? .....                                          | <input type="checkbox"/> 1 | <input type="checkbox"/> 2 |
| 467. Des oiseaux en cage ? .....                                           | <input type="checkbox"/> 1 | <input type="checkbox"/> 2 |
| 468. Des poules ? .....                                                    | <input type="checkbox"/> 1 | <input type="checkbox"/> 2 |
| 469. D'autres volailles de basse-cour (canards, oies, pintades...) ? ..... | <input type="checkbox"/> 1 | <input type="checkbox"/> 2 |
| 470. Des pigeons ? .....                                                   | <input type="checkbox"/> 1 | <input type="checkbox"/> 2 |
| 471. Des canards sauvages ? .....                                          | <input type="checkbox"/> 1 | <input type="checkbox"/> 2 |
| 472. Des cygnes ? .....                                                    | <input type="checkbox"/> 1 | <input type="checkbox"/> 2 |
| 473. Une vache ? .....                                                     | <input type="checkbox"/> 1 | <input type="checkbox"/> 2 |
| 474. Des moutons, chèvres ? .....                                          | <input type="checkbox"/> 1 | <input type="checkbox"/> 2 |
| 475. Un cochon ? .....                                                     | <input type="checkbox"/> 1 | <input type="checkbox"/> 2 |
| 476. Un cheval ou poney ? .....                                            | <input type="checkbox"/> 1 | <input type="checkbox"/> 2 |

477. Avant le diabète, le patient n'était en contact avec aucun animal ?  1 Vrai  2 Faux
478. Dans l'habitation ou le jardin, y avait-il des souris ?  1 Oui  2 Non
- Dans le voisinage de l'habitation (moins de 200 mètres) y avait-il :**
- |                                                | Oui                        | Non                        |
|------------------------------------------------|----------------------------|----------------------------|
| 479. Des renards ? .....                       | <input type="checkbox"/> 1 | <input type="checkbox"/> 2 |
| 480. Des hérissons ? .....                     | <input type="checkbox"/> 1 | <input type="checkbox"/> 2 |
| 481. Des cervidés (chevreuils, cerfs) ? .....  | <input type="checkbox"/> 1 | <input type="checkbox"/> 2 |
| 482. Des pigeons (de ville ou ramiers) ? ..... | <input type="checkbox"/> 1 | <input type="checkbox"/> 2 |
| 483. Des mouettes ? .....                      | <input type="checkbox"/> 1 | <input type="checkbox"/> 2 |
| 484. Des corbeaux ou corneilles ? .....        | <input type="checkbox"/> 1 | <input type="checkbox"/> 2 |
| 485. Des chauve-souris ? .....                 | <input type="checkbox"/> 1 | <input type="checkbox"/> 2 |
| 486. Un étang ou une mare ? .....              | <input type="checkbox"/> 1 | <input type="checkbox"/> 2 |
| 487. Une rivière ou un canal ? .....           | <input type="checkbox"/> 1 | <input type="checkbox"/> 2 |
| 488. Un ruisseau ou une source ? .....         | <input type="checkbox"/> 1 | <input type="checkbox"/> 2 |
| 489. Une forêt ? .....                         | <input type="checkbox"/> 1 | <input type="checkbox"/> 2 |
| 490. Une ferme ? .....                         | <input type="checkbox"/> 1 | <input type="checkbox"/> 2 |
| 491. Des vaches ? .....                        | <input type="checkbox"/> 1 | <input type="checkbox"/> 2 |
| 492. Des moutons, chèvres ? .....              | <input type="checkbox"/> 1 | <input type="checkbox"/> 2 |
| 493. Des cochons ? .....                       | <input type="checkbox"/> 1 | <input type="checkbox"/> 2 |
| 494. Des volailles ? .....                     | <input type="checkbox"/> 1 | <input type="checkbox"/> 2 |
| 495. Des chevaux ou poneys ? .....             | <input type="checkbox"/> 1 | <input type="checkbox"/> 2 |

### Les animaux pendant les vacances

Pendant les vacances, quels animaux étaient présents dans le proche voisinage (moins de 100 mètres) :

- |                                                                            | Oui                             | Non                             |
|----------------------------------------------------------------------------|---------------------------------|---------------------------------|
| 496. Un chien ? .....                                                      | <input type="checkbox"/> 1      | <input type="checkbox"/> 2      |
| 497. Un chat ? .....                                                       | <input type="checkbox"/> 1      | <input type="checkbox"/> 2      |
| 498. De petits rongeurs : souris, rats, mulots... ? .....                  | <input type="checkbox"/> 1      | <input type="checkbox"/> 2      |
| 499. Un lapin ? .....                                                      | <input type="checkbox"/> 1      | <input type="checkbox"/> 2      |
| 500. Des poissons, tortues en aquarium ? .....                             | <input type="checkbox"/> 1      | <input type="checkbox"/> 2      |
| 501. Des oiseaux en cage ? .....                                           | <input type="checkbox"/> 1      | <input type="checkbox"/> 2      |
| 502. Des poules ? .....                                                    | <input type="checkbox"/> 1      | <input type="checkbox"/> 2      |
| 503. D'autres volailles de basse-cour : canards, oies, pintades... ? ..... | <input type="checkbox"/> 1      | <input type="checkbox"/> 2      |
| 504. Des pigeons ? .....                                                   | <input type="checkbox"/> 1      | <input type="checkbox"/> 2      |
| 505. Une vache ? .....                                                     | <input type="checkbox"/> 1      | <input type="checkbox"/> 2      |
| 506. Des moutons, des chèvres ? .....                                      | <input type="checkbox"/> 1      | <input type="checkbox"/> 2      |
| 507. Un cochon ? .....                                                     | <input type="checkbox"/> 1      | <input type="checkbox"/> 2      |
| 508. Un cheval ou poney ? .....                                            | <input type="checkbox"/> 1      | <input type="checkbox"/> 2      |
| 509. D'autres animaux ? .....                                              | <input type="checkbox"/> 1      | <input type="checkbox"/> 2      |
| 510. En vacances, le patient n'était en contact avec aucun animal ?        | <input type="checkbox"/> 1 Vrai | <input type="checkbox"/> 2 Faux |

511. **Le père ou la mère étaient-ils en contact avec des animaux domestiques en dehors du domicile (chevaux, chiens, chats, etc) ?**

1 Oui       2 Non ➡ Allez à la question 512 page 47

511.1. **Si oui, avec quelle fréquence ?**

- 1 Tous les jours
- 2 Au moins une fois par semaine
- 3 Au moins une fois par mois
- 4 Plus rarement

| <b>De quels animaux s'agissait-il :</b>        | Oui                        | Non                        |
|------------------------------------------------|----------------------------|----------------------------|
| 511.2. <b>Chiens ?</b> .....                   | <input type="checkbox"/> 1 | <input type="checkbox"/> 2 |
| 511.3. <b>Chats ?</b> .....                    | <input type="checkbox"/> 1 | <input type="checkbox"/> 2 |
| 511.4. <b>Poules, canards, oies... ?</b> ..... | <input type="checkbox"/> 1 | <input type="checkbox"/> 2 |
| 511.5. <b>Lapins ?</b> .....                   | <input type="checkbox"/> 1 | <input type="checkbox"/> 2 |
| 511.6. <b>Ovins (chèvres, moutons) ?</b> ..... | <input type="checkbox"/> 1 | <input type="checkbox"/> 2 |
| 511.7. <b>Vaches ?</b> .....                   | <input type="checkbox"/> 1 | <input type="checkbox"/> 2 |
| 511.8. <b>Chevaux ?</b> .....                  | <input type="checkbox"/> 1 | <input type="checkbox"/> 2 |
| 511.9. <b>Autres ?</b> .....                   | <input type="checkbox"/> 1 | <input type="checkbox"/> 2 |

## 6 - LES PARENTS ET PROCHES DU FUTUR DIABÉTIQUE

### 6.1 - La famille du patient avant la découverte du diabète

#### La santé et les proches

*Attention ! Les questions qui suivent concernent la période allant de la naissance à la découverte du diabète*

#### Les parents

512. **La mère fumait-elle, durant cette période ?**

512.1. <sub>1</sub> Oui **Si oui, comment ?**

<sub>1</sub> Moins de 15 cigarettes par jour

<sub>2</sub> Plus de 15 cigarettes par jour

512.2. **Fumait-elle en présence du patient ?** <sub>1</sub> Oui <sub>2</sub> Non

<sub>2</sub> Non

513. **Le père fumait-il durant cette période ?**

513.1. <sub>1</sub> Oui **Si oui, comment ?**

<sub>1</sub> Moins de 15 cigarettes par jour

<sub>2</sub> Plus de 15 cigarettes par jour

513.2. **Fumait-il en présence du patient ?** <sub>1</sub> Oui <sub>2</sub> Non

<sub>2</sub> Non

514. **Une autre personne fumait-elle régulièrement au domicile familial ?** <sub>1</sub> Oui <sub>2</sub> Non

515. **L'un ou l'autre des parents a-t-il reçu des soins dentaires durant cette période ?** <sub>1</sub> Oui <sub>2</sub> Non

**Entre la naissance du patient et la découverte du diabète, l'un ou l'autre des parents a-t-il eu :**

|                                                                                                                     | Oui                                   | Non                                   |
|---------------------------------------------------------------------------------------------------------------------|---------------------------------------|---------------------------------------|
| 516. <b>La rougeole ?</b> .....                                                                                     | <input type="checkbox"/> <sub>1</sub> | <input type="checkbox"/> <sub>2</sub> |
| 517. <b>Les oreillons ?</b> .....                                                                                   | <input type="checkbox"/> <sub>1</sub> | <input type="checkbox"/> <sub>2</sub> |
| 518. <b>La varicelle ?</b> .....                                                                                    | <input type="checkbox"/> <sub>1</sub> | <input type="checkbox"/> <sub>2</sub> |
| 519. <b>Un syndrome pied-main-bouche (vésicules sur les paumes, les plantes de pieds et dans la bouche) ?</b> ..... | <input type="checkbox"/> <sub>1</sub> | <input type="checkbox"/> <sub>2</sub> |
| 520. <b>La grippe ?</b> .....                                                                                       | <input type="checkbox"/> <sub>1</sub> | <input type="checkbox"/> <sub>2</sub> |
| 521. <b>Une infection respiratoire ou une bronchiolite ?</b> .....                                                  | <input type="checkbox"/> <sub>1</sub> | <input type="checkbox"/> <sub>2</sub> |
| 522. <b>Une hépatite ?</b> .....                                                                                    | <input type="checkbox"/> <sub>1</sub> | <input type="checkbox"/> <sub>2</sub> |
| 523. <b>Des épisodes fébriles répétés ?</b> .....                                                                   | <input type="checkbox"/> <sub>1</sub> | <input type="checkbox"/> <sub>2</sub> |
| 524. <b>Une méningite virale ?</b> .....                                                                            | <input type="checkbox"/> <sub>1</sub> | <input type="checkbox"/> <sub>2</sub> |

525. **Un ou l'autre des parents a-t-il eu une diarrhée aiguë avec des vomissements ?**

525.1. <sub>1</sub> Oui **Si oui, d'été ?** <sub>1</sub> Oui <sub>2</sub> Non

525.2. **d'hiver ?** <sub>1</sub> Oui <sub>2</sub> Non

<sub>2</sub> Non



**Entre la naissance du patient et le diagnostic du diabète, la mère a-t-elle pris :**

|                                                                                                                                                      | souvent<br>5 fois par an ou<br>plus souvent | assez souvent<br>3 à 4 fois par an | rarement<br>1 ou 2 fois par an | Jamais                     |
|------------------------------------------------------------------------------------------------------------------------------------------------------|---------------------------------------------|------------------------------------|--------------------------------|----------------------------|
| 526. <b>Du paracétamol</b> (Doliprane, Efferalgan, Dafalgan...), <b>de l'ibuprofen</b> (Advyl, Nurofen...) <b>ou de l'aspirine</b> (Aspegic...)..... | <input type="checkbox"/> 1                  | <input type="checkbox"/> 2         | <input type="checkbox"/> 3     | <input type="checkbox"/> 4 |
| 527. <b>Un antiviral</b> : Zovirax .....                                                                                                             | <input type="checkbox"/> 1                  | <input type="checkbox"/> 2         | <input type="checkbox"/> 3     | <input type="checkbox"/> 4 |
| 528. <b>Un anti-inflammatoire stéroïdien</b> : Solupred, Celestene, Cortancyl.....                                                                   | <input type="checkbox"/> 1                  | <input type="checkbox"/> 2         | <input type="checkbox"/> 3     | <input type="checkbox"/> 4 |
| 529. <b>Un antibiotique</b> : Amoxicilline, Clamoxil, Orelox, Augmentin, Zithromax.....                                                              | <input type="checkbox"/> 1                  | <input type="checkbox"/> 2         | <input type="checkbox"/> 3     | <input type="checkbox"/> 4 |
| 530. <b>Un médicament contre les allergies</b> : Atarax, Polaramine, Zyrtec, Cétirizine, Aeries, Clarityne.....                                      | <input type="checkbox"/> 1                  | <input type="checkbox"/> 2         | <input type="checkbox"/> 3     | <input type="checkbox"/> 4 |
| 531. <b>Un médicament contre le cholestérol</b> : Crestor, Tahor, Zocor.....                                                                         | <input type="checkbox"/> 1                  | <input type="checkbox"/> 2         | <input type="checkbox"/> 3     | <input type="checkbox"/> 4 |
| 532. <b>Un médicament contre la toux</b> : Toplexil, Néocodion.....                                                                                  | <input type="checkbox"/> 1                  | <input type="checkbox"/> 2         | <input type="checkbox"/> 3     | <input type="checkbox"/> 4 |
| 533. <b>Un bronchodilatateur</b> : Ventoline, Serevent.....                                                                                          | <input type="checkbox"/> 1                  | <input type="checkbox"/> 2         | <input type="checkbox"/> 3     | <input type="checkbox"/> 4 |
| 534. <b>Un médicament contre les brûlures d'estomac, l'acidité gastrique</b> : Maalox, Mopral (Omeprazol).....                                       | <input type="checkbox"/> 1                  | <input type="checkbox"/> 2         | <input type="checkbox"/> 3     | <input type="checkbox"/> 4 |
| 535. <b>Un antidiarrhéique</b> : Ultralevure, Lactéol.....                                                                                           | <input type="checkbox"/> 1                  | <input type="checkbox"/> 2         | <input type="checkbox"/> 3     | <input type="checkbox"/> 4 |
| 536. <b>Un antidiarrhéique</b> : Imodium, Tiorfan.....                                                                                               | <input type="checkbox"/> 1                  | <input type="checkbox"/> 2         | <input type="checkbox"/> 3     | <input type="checkbox"/> 4 |
| 537. <b>Un médicament contre la constipation</b> : Transipeg, Spagulax, Forlax, Lactulose.....                                                       | <input type="checkbox"/> 1                  | <input type="checkbox"/> 2         | <input type="checkbox"/> 3     | <input type="checkbox"/> 4 |

**Entre la naissance du patient et le diagnostic du diabète, le père a-t-il pris :**

|                                                                                                                                                      | souvent<br>5 fois par an ou<br>plus souvent | assez souvent<br>3 à 4 fois par an | rarement<br>1 ou 2 fois par an | Jamais                     |
|------------------------------------------------------------------------------------------------------------------------------------------------------|---------------------------------------------|------------------------------------|--------------------------------|----------------------------|
| 538. <b>Du paracétamol</b> (Doliprane, Efferalgan, Dafalgan...), <b>de l'ibuprofen</b> (Advyl, Nurofen...) <b>ou de l'aspirine</b> (Aspegic...)..... | <input type="checkbox"/> 1                  | <input type="checkbox"/> 2         | <input type="checkbox"/> 3     | <input type="checkbox"/> 4 |
| 539. <b>Un antiviral</b> : Zovirax .....                                                                                                             | <input type="checkbox"/> 1                  | <input type="checkbox"/> 2         | <input type="checkbox"/> 3     | <input type="checkbox"/> 4 |
| 540. <b>Un anti-inflammatoire stéroïdien</b> : Solupred, Celestene, Cortancyl.....                                                                   | <input type="checkbox"/> 1                  | <input type="checkbox"/> 2         | <input type="checkbox"/> 3     | <input type="checkbox"/> 4 |
| 541. <b>Un antibiotique</b> : Amoxicilline, Clamoxil, Orelox, Augmentin, Zithromax.....                                                              | <input type="checkbox"/> 1                  | <input type="checkbox"/> 2         | <input type="checkbox"/> 3     | <input type="checkbox"/> 4 |
| 542. <b>Un médicament contre les allergies</b> : Atarax, Polaramine, Zyrtec, Cétirizine, Aeries, Clarityne.....                                      | <input type="checkbox"/> 1                  | <input type="checkbox"/> 2         | <input type="checkbox"/> 3     | <input type="checkbox"/> 4 |
| 543. <b>Un médicament contre le cholestérol</b> : Crestor, Tahor, Zocor.....                                                                         | <input type="checkbox"/> 1                  | <input type="checkbox"/> 2         | <input type="checkbox"/> 3     | <input type="checkbox"/> 4 |
| 544. <b>Un médicament contre la toux</b> : Toplexil, Néocodion.....                                                                                  | <input type="checkbox"/> 1                  | <input type="checkbox"/> 2         | <input type="checkbox"/> 3     | <input type="checkbox"/> 4 |
| 545. <b>Un bronchodilatateur</b> : Ventoline, Serevent.....                                                                                          | <input type="checkbox"/> 1                  | <input type="checkbox"/> 2         | <input type="checkbox"/> 3     | <input type="checkbox"/> 4 |
| 546. <b>Un médicament contre les brûlures d'estomac, l'acidité gastrique</b> : Maalox, Mopral (Omeprazol).....                                       | <input type="checkbox"/> 1                  | <input type="checkbox"/> 2         | <input type="checkbox"/> 3     | <input type="checkbox"/> 4 |
| 547. <b>Un antidiarrhéique</b> : Ultralevure, Lactéol.....                                                                                           | <input type="checkbox"/> 1                  | <input type="checkbox"/> 2         | <input type="checkbox"/> 3     | <input type="checkbox"/> 4 |
| 548. <b>Un antidiarrhéique</b> : Imodium, Tiorfan.....                                                                                               | <input type="checkbox"/> 1                  | <input type="checkbox"/> 2         | <input type="checkbox"/> 3     | <input type="checkbox"/> 4 |

- Le père a-t-il :** Oui Non
549. **Une maladie cardio-vasculaire ?** .....  1  2
550. **Un excès de cholestérol ?** .....  1  2
551. **De l'hypertension artérielle ?** .....  1  2
552. **Un diabète de type 1 ?** .....  1  2
553. **Un diabète de type 2 ?** .....  1  2

554. **Un des parents a-t-il fait un ou plusieurs séjours à l'étranger pendant la petite enfance du futur diabétique ?**

1 Oui  2 Non ➡ Allez à la question 555

- Si oui, dans quelle région :** Oui Non
- 554.1. **Europe ?**.....  1  2
- 554.2. **Afrique du nord ?** .....  1  2
- 554.3. **Reste de l'Afrique ?** .....  1  2
- 554.4. **Amérique du nord ?** .....  1  2
- 554.5. **Amérique centrale ou Amérique du sud ?** .....  1  2
- 554.6. **Asie ?** .....  1  2

### Les frères et sœurs

555. **Un frère ou une sœur du patient porte-t-il des lunettes ou/et des lentilles de correction de vue?**

555.1.  1 Oui  
 2 Non

556. **Un frère ou une sœur du témoin est-il myope ?**  1 Oui  2 Non

557. **Un frère ou une sœur a-t-il un diabète ?**  1 Oui  2 Non

*Les questions qui suivent concernent les frères ou sœurs du patient entre sa naissance et la découverte de son diabète*

558. **Durant cette période le patient avait-il des frères et sœurs vivant dans le foyer ?**

1 Oui  2 Non ➡ Allez à la question 559 page 50

*Sans toutefois vous livrer à une enquête trop poussée, pouvez-vous porter une attention particulière aux questions suivantes ?*

**Si oui, un frère ou une sœur a-t-il eu :** Oui Non

- 558.1. **Un syndrome pied-main-bouche (vésicules sur les paumes, les plantes de pieds et dans la bouche) ?** .....  1  2
- 558.2. **Une infection respiratoire ou une bronchiolite ?** .....  1  2
- 558.3. **Une hépatite ?** .....  1  2
- 558.4. **Des épisodes fébriles répétés ?** .....  1  2
- 558.5. **Une méningite virale ?** .....  1  2

558.6. **Un frère ou une sœur a-t-il eu une diarrhée aiguë avec des vomissements ?**

558.6.1.  1 Oui **Si oui, d'été ?**  1 Oui **d'hiver ?**  2 Oui  
 2 Non

558.7. **Les frères et sœurs ont-ils eu une maladie infectieuse sans gravité, mais avec de la fièvre (rhinopharyngites, gripes, otites, gastro-entérites) ?**

- 1 Rarement
- 2 Parfois
- 3 Assez souvent
- 4 Souvent
- 5 Très souvent

558.8. **En quelle saison (plusieurs réponses possibles) :**

- 1 Au printemps
- 2 En été
- 3 En automne
- 4 En hiver

558.9. **Un frère ou une sœur a-t-il un diabète ?**  1 Oui  2 Non

**Les grands-parents et les autres proches de la famille avec lesquels le patient a été en contact**

559. **Entre sa naissance et le diagnostic du diabète, le patient était-il en contact avec l'un au moins de ses grands-parents :**

- 1 Tous les jours
- 2 Au moins une fois par semaine
- 3 Au moins une fois par mois
- 4 Plus rarement
- 5 Jamais

*Sans toutefois vous livrer à une enquête trop poussée, pouvez-vous porter une attention particulière aux questions suivantes ?*

| <b>Un des grands-parents ou un des proches de la famille a-t-il eu :</b>                                       | Oui                        | Non                        |
|----------------------------------------------------------------------------------------------------------------|----------------------------|----------------------------|
| 560. <b>Un syndrome pied-main-bouche (éruption des paumes et des plantes et bulles dans la bouche) ?</b> ..... | <input type="checkbox"/> 1 | <input type="checkbox"/> 2 |
| 561. <b>La rougeole ?</b> .....                                                                                | <input type="checkbox"/> 1 | <input type="checkbox"/> 2 |
| 562. <b>La varicelle ?</b> .....                                                                               | <input type="checkbox"/> 1 | <input type="checkbox"/> 2 |
| 563. <b>Les oreillons ?</b> .....                                                                              | <input type="checkbox"/> 1 | <input type="checkbox"/> 2 |
| 564. <b>Une infection respiratoire ou une bronchiolite ?</b> .....                                             | <input type="checkbox"/> 1 | <input type="checkbox"/> 2 |
| 565. <b>La grippe ?</b> .....                                                                                  | <input type="checkbox"/> 1 | <input type="checkbox"/> 2 |
| 566. <b>Une diarrhée aiguë avec des vomissements ?</b> .....                                                   | <input type="checkbox"/> 1 | <input type="checkbox"/> 2 |
| 567. <b>Une hépatite ?</b> .....                                                                               | <input type="checkbox"/> 1 | <input type="checkbox"/> 2 |
| 568. <b>Des épisodes fébriles répétés ?</b> .....                                                              | <input type="checkbox"/> 1 | <input type="checkbox"/> 2 |
| 569. <b>Une méningite virale ?</b> .....                                                                       | <input type="checkbox"/> 1 | <input type="checkbox"/> 2 |

**6.2 - Loisirs des parents avant la découverte du diabète**

*Ces questions ne concernent que les loisirs des parents en dehors de la présence du patient diabétique*

570. **Le père ou la mère faisaient à cette période des randonnées ou du jogging en forêt :**

- 1 Au moins une fois par semaine
- 2 Au moins une fois par mois
- 3 Plus rarement
- 4 Jamais

571. **Le père ou la mère faisaient-ils des promenades ou du jogging dans la campagne :**

- <sub>1</sub> Au moins une fois par semaine
- <sub>2</sub> Au moins une fois par mois
- <sub>3</sub> Plus rarement
- <sub>4</sub> Jamais

**Le père ou la mère :** ..... Oui Non

572. **Jardinaient-ils (fleurs, plantes d'ornement) ?** ..... <sub>1</sub> <sub>2</sub>

573. **Jardinaient-ils (légumes, potager) ?** ..... <sub>1</sub> <sub>2</sub>

574. **Cueillaient-ils des champignons sauvages ?** ..... <sub>1</sub> <sub>2</sub>

575. **Le père ou la mère étaient-ils chasseurs?** <sub>1</sub> Oui <sub>2</sub> Non ➡ Allez à la question 576

575.1. **Etait-ce avec leur(s) propre(s) chien(s) ?** <sub>1</sub> Oui <sub>2</sub> Non

575.2. **Le père ou la mère chassaient-ils:**

- <sub>1</sub> Moins d'une fois par trimestre
- <sub>1</sub> 5 à 10 fois par an
- <sub>1</sub> Plus souvent

575.3. **Ramenaient-ils du gibier à la maison ?** <sub>1</sub> Oui <sub>2</sub> Non ➡ Allez à la question 576

**Si oui, de quel(s) animaux s'agissait-il :** Oui Non

575.3.1. **Sanglier ?** ..... <sub>1</sub> <sub>2</sub>

575.3.2. **Cerf ?** ..... <sub>1</sub> <sub>2</sub>

575.3.3. **Chevreuril ?** ..... <sub>1</sub> <sub>2</sub>

575.3.4. **Lièvre ?** ..... <sub>1</sub> <sub>2</sub>

575.3.5. **Canard et gibier d'eau ?** ..... <sub>1</sub> <sub>2</sub>

575.3.6. **Lapin de garenne ?** ..... <sub>1</sub> <sub>2</sub>

575.3.7. **Faisan ?** ..... <sub>1</sub> <sub>2</sub>

575.3.8. **Perdreau ou perdrix ?** ..... <sub>1</sub> <sub>2</sub>

575.3.9. **Autres ?** ..... <sub>1</sub> <sub>2</sub>

575.3.10. **Le gibier était-il préparé et consommé en famille ?** <sub>1</sub> Oui <sub>2</sub> Non

576. **Le père ou la mère étaient-ils pêcheurs ?** <sub>1</sub> Oui <sub>2</sub> Non ➡ Le questionnaire est terminé, Merci !

576.1. **En mer ?** <sub>1</sub> Oui <sub>2</sub> Non

576.2. **En eau douce ?** <sub>1</sub> Oui <sub>2</sub> Non

576.3. **Ramenaient-ils leur pêche à la maison ?** <sub>1</sub> Oui <sub>2</sub> Non ➡ Le questionnaire est terminé !

**Si oui, de quel(s) animaux s'agissait-il :** Oui Non

576.3.1. **Truites ?** ..... <sub>1</sub> <sub>2</sub>

576.3.2. **Brochets ?** ..... <sub>1</sub> <sub>2</sub>

576.3.3. **Carpes ?** ..... <sub>1</sub> <sub>2</sub>

576.3.4. **Autres ?** ..... <sub>1</sub> <sub>2</sub>

576.3.5. **La pêche était-elle consommée en famille ?** <sub>1</sub> Oui <sub>2</sub> Non

*Le questionnaire est terminé !  
Merci de nous le faire parvenir dans l'enveloppe pré-affranchie.*

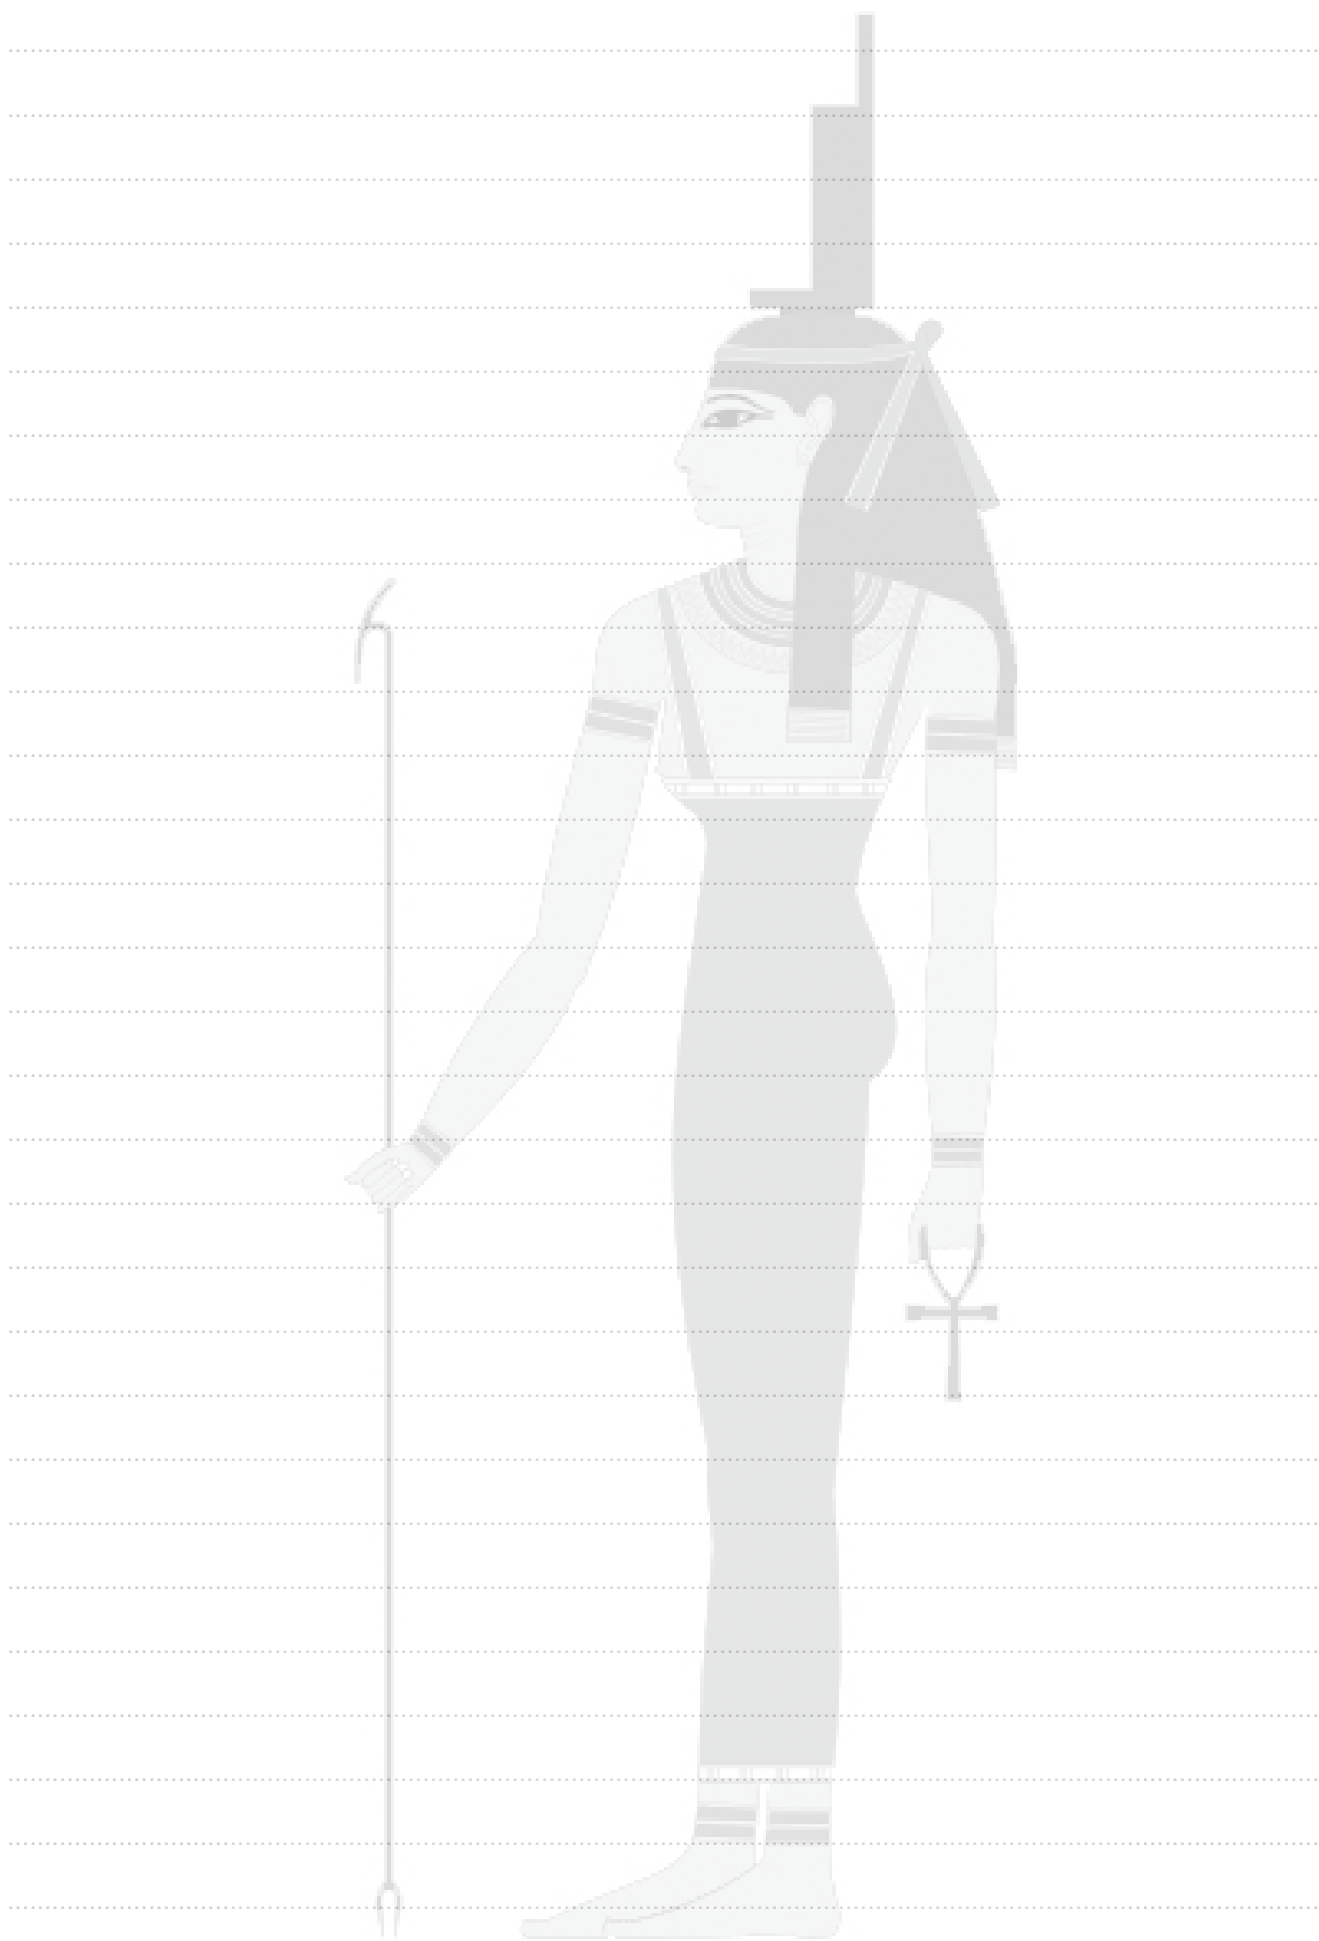

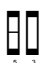

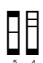

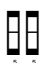



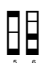

Supplement: MOESM1 [file 12889_2016_3690_MOESM1_ESM.pdf]
